# Supplementary material for: Evidence synthesis, practice guidelines and real-world prescriptions of new generation antidepressants in the treatment of depression: a protocol for cumulative network meta-analyses and meta-epidemiological study
Source: PubMed Central journal article supplement — BMJ Open. 2018 Dec 9;8(12):e023222. doi: 10.1136/bmjopen-2018-023222 (PMC6303574; doi:10.1136/bmjopen-2018-023222), 2018-12-09
Supplement: bmjopen-2018-023222.draft_revisions.pdf [file bmjopen-2018-023222.draft_revisions.pdf]

# BMJ Open

BMJ Open is committed to open peer review. As part of this commitment we make the peer review history of every article we publish publicly available.

When an article is published we post the peer reviewers' comments and the authors' responses online. We also post the versions of the paper that were used during peer review. These are the versions that the peer review comments apply to.

The versions of the paper that follow are the versions that were submitted during the peer review process. They are not the versions of record or the final published versions. They should not be cited or distributed as the published version of this manuscript.

BMJ Open is an open access journal and the full, final, typeset and author-corrected version of record of the manuscript is available on our site with no access controls, subscription charges or pay-per-view fees (<http://bmjopen.bmj.com>).

If you have any questions on BMJ Open's open peer review process please email [editorial.bmjopen@bmj.com](mailto:editorial.bmjopen@bmj.com)

# BMJ Open

## Evidence Synthesis, Practice Guidelines and Real-World Prescriptions of New Generation Antidepressants in the Treatment of Depression: A Protocol.

|                               |                                                                                                                                                                                                                                                                                                                                                                                                                                                                                                                                                                                                                                                                                                                                                                                           |
|-------------------------------|-------------------------------------------------------------------------------------------------------------------------------------------------------------------------------------------------------------------------------------------------------------------------------------------------------------------------------------------------------------------------------------------------------------------------------------------------------------------------------------------------------------------------------------------------------------------------------------------------------------------------------------------------------------------------------------------------------------------------------------------------------------------------------------------|
| Journal:                      | <i>BMJ Open</i>                                                                                                                                                                                                                                                                                                                                                                                                                                                                                                                                                                                                                                                                                                                                                                           |
| Manuscript ID                 | bmjopen-2018-023222                                                                                                                                                                                                                                                                                                                                                                                                                                                                                                                                                                                                                                                                                                                                                                       |
| Article Type:                 | Protocol                                                                                                                                                                                                                                                                                                                                                                                                                                                                                                                                                                                                                                                                                                                                                                                  |
| Date Submitted by the Author: | 27-Mar-2018                                                                                                                                                                                                                                                                                                                                                                                                                                                                                                                                                                                                                                                                                                                                                                               |
| Complete List of Authors:     | Luo, Yan; School of Public Health in the Graduate School of Medicine, Kyoto University, Department of Health Promotion and Human Behavior<br>Chaimani, Anna; Paris Descartes University; Sorbonne Paris Cité Research Center, METHODS Team, Epidemiology and Statistics<br>Kataoka, Yuki<br>Ostinelli, Edoardo; Università degli Studi di Milano, Department of Health Sciences<br>Ogawa, Yusuke ; School of Public Health in the Graduate School of Medicine, Kyoto University, Department of Health Promotion and Human Behavior<br>Cipriani, Andrea; University of Oxford, Department of Psychiatry<br>Salanti, Georgia; University of Bern, Institute of Social and Preventive Medicine<br>Furukawa, Toshi; Kyoto University, Graduate School of Medicine and School of Public Health |
| Keywords:                     | Network meta-analysis, Practice guidelines, Depression & mood disorders < PSYCHIATRY, Antidepressants                                                                                                                                                                                                                                                                                                                                                                                                                                                                                                                                                                                                                                                                                     |
|                               |                                                                                                                                                                                                                                                                                                                                                                                                                                                                                                                                                                                                                                                                                                                                                                                           |

SCHOLARONE™  
Manuscripts

**Title page****Title**

Evidence Synthesis, Practice Guidelines and Real-World Prescriptions of New Generation Antidepressants in the Treatment of Depression: A Protocol

**Authors**

Yan Luo<sup>1</sup>, lilacluo@gmail.com

Anna Chaimani<sup>2</sup>, anna.chaimani@parisdescartes.fr

Yuki Kataoka<sup>3</sup>, youkiti@gmail.com

Edoardo G. Ostinelli<sup>4</sup>, edoardo.ostinelli@unimi.it

Yusuke Ogawa<sup>1</sup>, ogawa.yusuke.2u@kyoto-u.ac.jp

Andrea Cipriani<sup>5</sup>, andrea.cipriani@psych.ox.ac.uk

Georgia Salanti<sup>6</sup>, georgia.salanti@ispm.unibe.ch

Toshi A Furukawa<sup>1</sup>, furukawa@kuhp.kyoto-u.ac.jp

**Affiliations**

1. Department of Health Promotion and Human Behavior, School of Public Health in the Graduate School of Medicine, Kyoto University, Kyoto, Japan
2. Paris Descartes University, Paris, France; Epidemiology and Statistics, Sorbonne Paris Cité Research Center, METHODS Team, Paris, France; Cochrane France, Paris, France
3. Hospital Care Research Unit, Hyogo Prefectural Amagasaki General Medical Center, Hyogo, Japan
4. Department of Health Sciences, Università degli Studi di Milano, Milan, Italy
5. Department of Psychiatry, University of Oxford, Oxford, UK
6. Institute of Social and Preventive Medicine, University of Bern, Bern, Switzerland

**Corresponding author**

Toshi A Furukawa, MD, PhD

Department of Health Promotion and Human Behavior, School of Public Health in the Graduate School of Medicine, Kyoto University, Yoshida Konoe-cho, Sakyo-ku, Kyoto 606-8501, Japan

Phone: +81-75-753-9491

Fax: +81-75-753-4641

Email: [furukawa@kuhp.kyoto-u.ac.jp](mailto:furukawa@kuhp.kyoto-u.ac.jp)

**Word count**

3123

## Abstract

### Introduction

Depressive disorders are the most common, burdensome and costly mental disorders. Their treatments have developed through the past decades and we now have more than a dozen new generation antidepressants, while series of guidelines have been published to provide recommendations over the years. However, there still may exist important gaps in this evidence synthesis and implementation process. Systematic reviews may not have been conducted in the most unbiased, informative and timely manners; guidelines may not have reflected the most up-to-date evidence; clinicians may not have changed their clinical decision makings in accordance with the relevant evidence. The aim of this study is to examine the gaps between the ideally synthesized evidence, guideline recommendations and real-world clinical practices in the prescription of new generation antidepressants for major depression through the past three decades.

### Methods and analysis

We will conduct cumulative network meta-analyses (cNMAs) based on the comprehensive systematic review which has identified published and unpublished head-to-head randomized controlled trials comparing the following antidepressants in the acute phase treatment of major depression: agomelatine, amitriptyline, bupropion, citalopram, clomipramine, desvenlafaxine, duloxetine, escitalopram, fluoxetine, fluvoxamine, levomilnacipran, milnacipran, mirtazapine, nefazodone, paroxetine, reboxetine, sertraline, trazodone, venlafaxine, vilazodone and vortioxetine. The primary outcomes will be the proportions of patients who responded (efficacy) and who withdrew from treatment for any reasons (acceptability). We will conduct a random effects cNMA to synthesize evidence and obtain a comprehensive ranking of all new generation antidepressants based on their surface under the cumulative ranking curves. We will identify series of international clinical practice guidelines for the treatment of major depression of adults and summarize their recommendations. We will estimate real-world prescription patterns of antidepressants in the nationally representative samples in USA in the Medical Expenditure Panel Survey. We will compare and evaluate the gaps between the rankings according to cNMAs conducted at 5-year intervals between 1990 and 2015, recommendations in guidelines published in the ensuing five years, and actual practices thereafter.

### Ethics and dissemination

This review does not require ethical approval. We will disseminate our findings through publications in peer-reviewed journals and presentations at conferences.

### Trial registration number

UMIN000031898.

### Strengths and limitations

- This is one of the first studies to directly compare evidence derived from network meta-analyses,

1  
2  
3 recommendations from guidelines, and real-world clinical practices.

- 4 • This study will show where the gaps may lie and how big they are, which can inform future  
5 efforts to bridge the gaps from scientific evidence to real-world clinical practices.  
6  
7 • The cumulative network meta-analysis used in this study may evolve into prospectively  
8 designed sequential network meta-analysis which can be used as living accumulation of  
9 evidence and contribute to living guidelines.  
10  
11 • A major limitation of our study is that the real-world practices in nationally representative  
12 samples are available for USA only.  
13  
14

15  
16 **Key words**

17 Network meta-analysis, Practice guidelines, Depression, Antidepressants  
18  
19  
20  
21  
22  
23  
24  
25  
26  
27  
28  
29  
30  
31  
32  
33  
34  
35  
36  
37  
38  
39  
40  
41  
42  
43  
44  
45  
46  
47  
48  
49  
50  
51  
52  
53  
54  
55  
56  
57  
58  
59  
60

## INTRODUCTION

Evidence-based medicine (EBM) is widely regarded as the guiding principle of today's medical practices, for it can help integrate patients' values, physicians' experiences and scientific evidence derived from large scale research to inform clinical decision-making.<sup>1</sup> To promote EBM, systematic reviews (SRs) including meta-analyses (MAs) should be conducted to produce a comprehensive summary of all relevant studies, clinical practice guidelines (CPGs) will be proposed based on such evidence synthesis, and physicians must update their shared decision making processes in accordance with such guidelines.<sup>2</sup>

Depressive disorders are the most common mental disorders, making them the second leading cause of disability accounting for 8.2% of all years lived with disability (YLDs) in 2010.<sup>3-5</sup> Reflecting the high prevalence of major depressive disorder (MDD) among people of working ages and the resulting dysfunctions, their economic burden was estimated at US \$210.5 billion in US alone in 2010.<sup>6</sup> Antidepressants are widely used in the treatment of MDD, and a host of new generation antidepressants have been approved into the market in the past two to three decades. Given the enormity of burdens due to MDD on patients and society, various institutions worldwide have produced clinical practice guidelines (CPGs) for physicians. It was as early as in 1993 that American Psychiatric Association (APA)<sup>7</sup>, British Association for Psychopharmacology (BAP)<sup>8</sup> and Agency for Health Care Policy and Research (AHCPR)<sup>9</sup> proposed the first version of their guidelines, followed by other associations like National Institute for Health and Care Excellence (NICE) from UK<sup>10</sup> and Canadian Network for Mood and Anxiety Treatments (CANMAT) from Canada<sup>11</sup>. Most of these guidelines have been updated every several years since.

However there are still several important barriers that may impede physicians and patients from making optimal clinical decisions. First, it has become increasingly known that a substantive amount of trials of antidepressants remain unpublished and were not included in contemporary SRs, a fact which most likely introduces publication bias into the results of SRs and thus undermines the credibility of guidelines.<sup>12</sup> Second, it has been reported that there is approximately eight months to more than one year's lag between the last search date in the literature and the publication of an SR,<sup>13</sup> and in total 2.5-6.5 years' interval between the publication dates of the latest primary studies and the publication date of SRs,<sup>15</sup> which makes most SRs already out of date at the time of their publication. Third, few of the available CPGs provide specific and precise recommendations in the choice of antidepressants, as pooled evidence has been given conflicting interpretations.<sup>16 17</sup> Fourth, physicians' behaviors are notoriously difficult to influence.<sup>18-20</sup> The road from randomized evidence to actual practices thus appears formidable.<sup>21</sup>

The aim of the present study is to examine how the accumulating body of evidence should have been assembled, and reflected in guidelines, and then transferred into real practices in the prescription of new generation antidepressants for MDD through the past three decades. The evidence we will consider comes from a uniquely comprehensive dataset prepared by GRISelda (Group of Researchers Investigating Specific Efficacy of individual Drugs for Acute depression).<sup>22 23</sup> It

comprises data from 522 published and unpublished double-blind randomized controlled trials of new generation and other antidepressants in the acute treatment of depression. Capitalizing on this, we will use cumulative network analysis (cNMA) to summarize the development of accumulated evidence over time.<sup>24-26</sup> When two or more treatment alternatives are available, as in the case of MDD, NMA can summarize the relative effects of all treatments options by combining both direct and indirect comparisons<sup>27</sup>; because they utilize all direct and indirect evidence, they can produce strong evidence concerning relative efficacy more often and earlier than conventional, pairwise meta-analyses<sup>28</sup>. We will examine the specific recommendations in the internationally representative CPGs. The real-world prescription practices will be collated from Medical Expenditure Panel Survey (MEPS) in USA, which is a large-scale yearly healthcare survey of representative samples of families and individuals in the United States.<sup>29</sup> We predict that there are important gaps in the evidence synthesis and implementation process. Our study will evaluate and narratively summarize how big these gaps are and where mainly they exist, and will provide valuable information necessary to direct future paths to bridge the gaps from scientific evidence to real-world clinical practice.

## METHODS

### **Systematic reviews of RCTs of new generation antidepressants and cumulative network meta-analysis**

#### *Study eligibility*

The cNMAs in this study will be based on the systematic review which has identified all published and unpublished double-blinded head-to-head RCTs comparing any of the following new generation antidepressants in the acute phase treatment of adults with MDD up to January 2016<sup>22 23</sup>: we will consider all new generation antidepressants approved by drug agencies of US, Europe or Japan including agomelatine, bupropion, citalopram, desvenlafaxine, duloxetine, escitalopram, fluoxetine, fluvoxamine, levomilnacipran, milnacipran, mirtazapine, paroxetine, reboxetine, sertraline, venlafaxine, vilazodone and vortioxetine.

The GRISELDA dataset also contains two older tricyclic antidepressants (TCAs) recommended by WHO Model List of Essential Medicines (amitriptyline and clomipramine) and two drugs with distinct effect and side-effect profiles (trazodone and nefazodone): they will constitute evidence set<sup>30</sup> in the NMAs which serves to connect and strengthen the network.

We will include in the meta-analysis only study arms which administered the drugs within dose ranges approved by the regulatory agencies. Because the inclusion of placebo-controlled trials may violate the transitivity assumption of NMA in depression studies<sup>31-35</sup>, and because we will be comparing the evidence from cNMA with real-world practice, we will only include RCTs comparing active drugs and exclude placebo-controlled studies in the current cNMAs.

### *Study identification and data extraction*

GRISELDA has searched the following databases without language restrictions for published articles: Cochrane Central Register of Controlled Trials (CENTRAL), CINAHL, EMBASE, LiLACS, MEDLINE, MEDLINE In-Process, and PsycINFO up to January 2016. We performed manual searches of references of included articles. We also searched for published, unpublished and ongoing RCTs in drug-approval agencies' documents, company websites, international trial registries, and through contact with pharmaceutical companies and other relevant organizations. Where necessary, we contacted study authors directly to get supplementary materials for further information. The risk of bias of each included study was assessed according to the guide proposed in the Cochrane Collaboration Handbook.<sup>36</sup>

Study identification, data extraction and risk of bias assessment of the included studies were all performed independently by two researchers, and any disagreements were resolved through discussion or in consultation with a third reviewer. For further details of the systematic review process, please see the published protocol and the main GRISELDA paper.<sup>22 23</sup>

### *Statistical analyses*

We will conduct cNMA every 5 years in consideration of the speed of accumulating new trials and publication of guidelines for MDD. According to previous studies which indicated that the latest search of database was about one year before publication of SRs,<sup>13-15</sup> cNMA at any time point will include all trials completed up to 1 year before. For trials whose completion year is not available, publication date will be used; when neither is known, the date of approval of the drug by regulatory agencies will be used as the study completion date.

For network meta-analysis, transitivity assumption is the principle. Since we have confirmed the transitivity assumption of the whole data set in the final network meta-analysis<sup>23</sup>, we will not validate it at every time point re-analysis. In our previous study, we investigated the distribution of the following potential effect modifiers across treatment comparison: (1) study year; (2) sponsorship; (3) depressive severity at baseline; (4) dosing schedule; (5) proportion of participants allocated to placebo; (6) number of recruiting centers (single-center vs multi-centric studies). We evaluated consistency and heterogeneity in the entire network using various tests and metrics and we have found little evidence of inconsistency and heterogeneity.<sup>23</sup>

Our primary outcomes are (i) efficacy of the intervention in terms of response rate defined as the proportion of patients who showed a reduction of at least 50% on the total depression severity score compared to baseline, and (ii) acceptability of the intervention in terms of all-cause discontinuation rate defined as the proportion of patients who leave the study early for any reason. We have extracted the outcome data at a time point as close to 8 weeks as possible: if outcomes at 8 weeks were not available, we recorded data between 4 and 12 weeks.

We will not adjust for multiple comparisons in successive NMAs as we are not testing particular hypotheses for specific comparisons among antidepressants.



1  
2  
3 We will use the surface under the cumulative ranking curve (SUCRA) to estimate ranking  
4 probabilities for each intervention with regard to the two primary outcomes. We will show ranked  
5 forest plots of ORs with 95% CI in comparison with a common comparator as a sensitivity analysis:  
6 we will use fluoxetine as the common comparator as it is the most frequently used drug in the trials  
7 network.<sup>23</sup>  
8  
9

10 We will use STATA (Stata Corp 2015. Stata Statistical Software: Release 14. College Station, TX:  
11 StataCorp) to conduct cNMA.<sup>37 38</sup>  
12  
13

#### 14 **Identification and extraction of recommendations in guidelines**

15 We will use a series of CPGs as our benchmark in comparisons. We will extract recommendations  
16 for specific antidepressants or for specific classes of antidepressants from internationally  
17 representative guidelines listed below:  
18  
19

- 20 1) Practice guidelines for the treatment of patients with major depressive disorder published  
21 by American Psychiatric Association (APA), in 1993, 2000, 2010 respectively.<sup>7 39 40</sup>
- 22 2) Guidelines for management of depression proposed by National Institute for Health and  
23 Care Excellence (NICE), in 2004, 2009 and 2018.<sup>10 41 42</sup>
- 24 3) Guidelines for treating depressive disorders with antidepressants proposed by British  
25 Association for Psychopharmacology (BAP), in 1993, 2000, 2008 and 2015.<sup>8 43-45</sup>
- 26 4) Clinical guidelines for the management of major depressive disorder in adults proposed by  
27 Canadian Network for Mood and Anxiety Treatments (CANMAT), in 2001, 2009 and  
28 2016.<sup>46-48</sup>

29  
30  
31 We will extract recommendations with respect to acute phase treatment for adult patients with a  
32 primary diagnosis of unipolar non-psychotic major depression. We define recommendations as  
33 statements used in CPGs involving the words like “recommend”, “must”, “necessary”, “should”,  
34 “appropriate” or other words indicating instructions from guidelines. We will also collect the quality  
35 of evidence and strength of recommendations backing extracted recommendations. Two researchers  
36 will independently identify recommendations and extract information from CPGs. Any disagreement  
37 will be resolved through discussion or in consultation with a third researcher.  
38  
39  
40  
41  
42  
43

#### 44 **Real-world prescriptions data extraction**

45 We will extract real-world prescription data from the Medical Expenditure Panel Survey (MEPS)  
46 database.<sup>29</sup> MEPS is a database composed of large-scale surveys of families and individuals and their  
47 medical providers, collecting data on the use of specific health services, the cost, and the health  
48 insurance in the United States. The survey started in 1996. MEPS has two major components, the  
49 household component and the insurance component, both of which provide data on a yearly basis. In  
50 the household component a representative sample of families and individuals are interviewed every  
51 year and detailed information including demographic characteristics, health status, use of medical  
52 services, specific medications, cost for each person is collected. Each annual MEPS household  
53  
54  
55  
56  
57  
58  
59  
60

1  
2  
3 sample size is about 15,000 households. This set of households is a subsample of households  
4 participating in the previous year's National Health Interview Survey (NHIS) led by the National  
5 Center for Health Statistics. The NHIS sampling frame gives a nationally representative sample of  
6 the non-institutionalized population in the US, and oversamples of Blacks and Hispanics. In 2006,  
7 after implementing a new sample design, Asian population has been included in order to deal with  
8 the oversampling issues. To correct for oversampling and for non-response, each participant is given  
9 a weight adjusting for nonresponse over time and some poststratification variables (region,  
10 race/ethnicity, sex, age, poverty status and etc.), in order to produce national estimates.<sup>29</sup> MEPS  
11 database has been used for the analysis of health expenditures and real-world prescriptions of  
12 specific drugs in several studies.<sup>49-51</sup>

### 17 18 *Participants*

19 We will include those who have been classified as “Depressive disorders” in the category of “657  
20 Mood disorder”, of either sex and aged 18 years or older. The corresponding ICD-10 numbers are:  
21 29383 29620 29621 29622 29623 29624 29625 29626 29630 29631 29632 29633 29634 29635  
22 29636 3004 311. MEPS database only code the diagnosis for the first 3 digits using ICD numbers  
23 (293, 296, 300, 311).

### 27 28 *Interventions*

29 Of the 21 antidepressants included in the GRISELDA network, the following drugs will not be  
30 included among the drugs prescribed for depressive disorders in MEPS: agomelatine and reboxetine  
31 have not been approved by FDA for marketing in USA, fluvoxamine has an indication for  
32 obsessive-compulsive disorder but not for depression, and milnacipran for fibromyalgia only. On the  
33 other hand, there are many antidepressants, other than new generation antidepressants, which may  
34 have been prescribed especially in older days, such as imipramine, desipramine, doxepin or  
35 nortriptyline. Although our focus of comparison is new generation antidepressants, we will extract  
36 the frequency of prescription of all antidepressants in the MEPS study. Using the National Drug  
37 Code Directory<sup>52</sup>, which included all registered drugs in FDA, we identified all antidepressants ever  
38 used in the USA as the following: 1) Tricyclic Antidepressants [EPC]: amitriptyline, amoxapine,  
39 clomipramine, desipramine, doxepin, imipramine, nortriptyline, protriptyline, trimipramine; 2)  
40 Serotonin Reuptake Inhibitor [EPC]: citalopram, escitalopram, fluoxetine, nefazodone, paroxetine,  
41 sertraline, trazodone; 3) Serotonin and Norepinephrine Reuptake Inhibitor [EPC]: desvenlafaxine,  
42 duloxetine, venlafaxine, levomilnacipran; 4) No Pharm Class: bupropion, mirtazapine, vilazodone,  
43 vortioxetine. All the 24 listed antidepressants will be searched in MEPS during data extraction.

### 51 52 *Data extraction*

53 We will extract prescription data for antidepressants listed above in the year 1996, 2000, 2005, 2010  
54 and 2015 (Table 1). Since diagnostic labels available MEPS data cannot distinguish unipolar  
55  
56

1  
2  
3 depression from bipolar depression and psychotic depression, both of which require different drug  
4 treatments than unipolar depression, we will exclude those patients who are concomitantly taking  
5 mood stabilizers or any antipsychotics. According to the National Drug Code Directory<sup>52</sup>, Mood  
6 Stabilizer [EPC] include: carbamazepine, divalproex, lamotrigine, lithium, valproate, valproic acid;  
7 and Phenothiazine [EPC], Typical Antipsychotics [EPC] and Atypical Antipsychotics [EPC] include:  
8 aripiprazole, asenapine, brexipiprazole, cariprazine, chlorpromazine, clozapine, fluphenazine,  
9 haloperido, iloperidone, loxapine, lurasidone, molindone, olanzapine, paliperidone, perphenazine,  
10 pimavanserin, quetiapine, risperidone, thioridazine, thiothixene, ziprasidone. We will exclude all  
11 participants taking any of these drugs concomitantly with an antidepressant.

12  
13  
14  
15 Every participant in one MEPS cohort (called 'panel' in MEPS) is interviewed five times (called  
16 'rounds') for 2 years. For example, the file of 2015 contains the 2015 portion of Round 3 and Rounds  
17 4 and 5 for Panel 19, as well as Rounds 1, 2 and the 2015 portion of Round 3 for Panel 20 (see  
18 Figure 1).<sup>29</sup> We will check the prescription of antidepressants at round 2 from panel 20 and round 4  
19 from panel 19 (similar patterns in other given years), because each participant, either from panel 19  
20 or 20, must have this intermediate round of interview within 2015, and we will use it as a  
21 cross-sectional investigation. We will use the total number of patients with the diagnosis of  
22 depression and who are on antidepressants at this round as denominator, and the prescription for a  
23 particular drug as numerator. Given lack of precise information for medication schedule (e.g. start  
24 time of diagnosis, primary medication, time of start and change of medication), we will not be able to  
25 restrict the prescriptions to inception prescriptions in the acute phase treatment of MDD, and the  
26 results will include both incident and prevalent uses. As MEPS data set give each participant a  
27 sample weight according to nonresponse and poststratification variables, we will use the sample  
28 weights to estimate the nationally representative number of patients on a specific therapy. Finally the  
29 ranking of the of prescriptions will then be based on the estimated numbers of prescriptions in the  
30 general US population.

31  
32 We will use Python 3.6 to extract data from MEPS dataset.

### 33 34 35 **Comparison between cNMA, CPGs, and real-world prescriptions**

36  
37 We propose that a cNMA at a specific time point (e.g. 2000) should be taken as a reference for any  
38 guidelines that are going to be published in the next five years (e.g. 2000 through 2004), and then  
39 inform real world prescriptions afterwards (e.g. 2005 and after). We will therefore compare the  
40 results of NMA, CPG recommendations and real-world practice in these corresponding years. Table  
41 1 shows the time periods for comparisons. We will assess if the recommendable sets estimated from  
42 cNMA (i.e. drugs which have good balance between efficacy and acceptability) are reflected in the  
43 drugs recommended by guidelines, which then will be compared with the rankings in actual clinical  
44 practice. We will describe the possible differences and explore the time lag from the ideally available  
45 evidence to guideline recommendations and from guideline recommendations to the real world  
46 practices. We will also investigate the potential factors which may influence the actual prescriptions  
47  
48  
49  
50  
51  
52  
53  
54  
55  
56

including side-effects profiles of specific drugs, year of FDA approval, the price of the drug while on patent, and the year of patent expiration of each drug.

**Table 1. Time periods for comparisons in our study.**

| Trials (completion year*) | Cumulative NMAs | CPGs (publication year) | Real world prescriptions (MEPS data file year) |
|---------------------------|-----------------|-------------------------|------------------------------------------------|
| ~present                  | present         | 2016~present            | -                                              |
| ~2009                     | 2010            | 2010~2014               | 2015                                           |
| ~2004                     | 2005            | 2005~2009               | 2010                                           |
| ~1999                     | 2000            | 2000~2004               | 2005                                           |
| ~1994                     | 1995            | 1995~1999               | 2000                                           |
| ~1989                     | 1990            | 1990~1994               | 1996**                                         |

\* For trials whose completion year is not available, publication date will be used; when neither is known, the date of approval of the drug by regulatory agencies will be used as its completion date.

\*\*As MEPS database started with 1996, so we will use data from 1996 for the analysis of prescriptions.

## DISCUSSION

We have presented the study protocol for investigating the gaps between ideally synthesized evidence, guideline recommendations and real-world clinical practices in the prescriptions of new generation antidepressants for unipolar major depressive disorders.

Our study has several strengths. It is one of the first studies to make comparisons between pooled evidence derived from cumulative network meta-analyses, recommendations from guidelines, and real-world clinical practices. In the cNMA, we will use the comprehensive dataset from our previous study<sup>23</sup>, which included both published and unpublished trials. And we will use MEPS database, which collect detailed information of health status and specific medications from a representative sample in the US, as a reflection of real world prescription profile. We expect this study to show the gaps between evidence and practice, and our findings will inform future developments of evidence-based medicine. For instance, the cNMA used in this study may eventually evolve into prospectively designed sequential network meta-analysis which can be used to continuously update evidence and contribute to living guidelines.

There are some limitations to our study. First, as we will use a database to reflect the real-world prescription patterns, we are not able to extract very precise information from the database, such as the specific diagnosis of the patients, or whether the therapy was used as first-line or later treatments, which to some extent may lower the comparability between the cNMA of acute phase treatment studies of unipolar depression and the real world practices. Second, MEPS is a US study and we were not able to make comparisons between guideline recommendations and actual practices in other countries. Last, the reasons behind the differences between evidence and practice may be so

1  
2  
3 complicated that we will need to factor in various potential confounding factors such as the  
4 side-effects, price of a particular drug and marketing efforts of pharmaceutical companies.<sup>53 54</sup>

5  
6 In conclusion, our study represents a unique inquiry into gaps from evidence to real-world practices,  
7 and may provide valuable insights into future developments of EBM.  
8  
9

### 10 **Ethics and dissemination**

11 This study does not require institutional review board approval. We have registered it in the University hospital  
12 Medical Information Network Clinical Trials Registry (UMIN-CTR): UMIN000031898.  
13  
14

### 15 **Funding**

16 This study was supported in part by JSPS Grant-in-Aid for Scientific Research (Grant Number17k19808) to TAF.  
17  
18  
19

### 20 **Competing interests**

21 TAF has received lecture fees from Janssen, Meiji, Mitsubishi-Tanabe, MSD and Pfizer. He has received research  
22 support from Mitsubishi-Tanabe and Mochida. ACi is supported by the NIHR Oxford Cognitive Health Clinical  
23 Research Facility, and was expert witness for Accord Healthcare for a patent issue about quetiapine extended  
24 release. All the other authors report no competing interests to declare.  
25  
26  
27

### 28 **Acknowledgement**

29 We would like to thank all the constructive comments and advices from the members from the  
30 meta-epidemiological study group in the School of Public Health, Kyoto University.  
31  
32  
33

### 34 **Contributors**

35 YL and TAF conceived the study and drafted the protocol. ACh, YK, EGO, YO, ACi and GS assisted in the study  
36 design and critically revised the protocol. All authors gave final approval of the version to be published.  
37  
38  
39  
40  
41  
42  
43  
44  
45  
46  
47  
48  
49  
50  
51  
52  
53  
54  
55  
56  
57  
58  
59  
60

## REFERENCES

1. Djulbegovic B, Guyatt GH. Progress in evidence-based medicine: a quarter century on. *Lancet* 2017;390(10092):415-23. doi: 10.1016/S0140-6736(16)31592-6
2. Haynes RB. Of studies, syntheses, synopses, summaries, and systems: the "5S" evolution of information services for evidence-based healthcare decisions. *Evid Based Med* 2006;11(6):162-4. doi: 10.1136/ebm.11.6.162-a
3. DALYs GBD, Collaborators H, Murray CJ, et al. Global, regional, and national disability-adjusted life years (DALYs) for 306 diseases and injuries and healthy life expectancy (HALE) for 188 countries, 1990-2013: quantifying the epidemiological transition. *Lancet* 2015;386(10009):2145-91. doi: 10.1016/S0140-6736(15)61340-X
4. DALYs GBD, Collaborators H. Global, regional, and national disability-adjusted life-years (DALYs) for 315 diseases and injuries and healthy life expectancy (HALE), 1990-2015: a systematic analysis for the Global Burden of Disease Study 2015. *Lancet* 2016;388(10053):1603-58. doi: 10.1016/S0140-6736(16)31460-X
5. WHO. Depression: fact sheet. Geneva: World Health Organisation, 2017. Sep 21, 2017
6. Ferrari AJ, Charlson FJ, Norman RE, et al. Burden of depressive disorders by country, sex, age, and year: findings from the global burden of disease study 2010. *PLoS Med* 2013;10(11):e1001547. doi: 10.1371/journal.pmed.1001547 [published Online First: 2013/11/14]
7. Practice guideline for major depressive disorder in adults. American Psychiatric Association. *Am J Psychiatry* 1993;150(4 Suppl):1-26. doi: 10.1176/ajp.150.4.1
8. Montgomery SA, Bebbington P, Cowen P, et al. Guidelines for treating depressive illness with antidepressants: A statement from the British Association for Psychopharmacology. *J Psychopharmacol* 1993;7(1 Suppl):19-23. doi: 10.1177/0269881193007001041
9. AHCPR Clinical Practice Guidelines N. Depression in Primary Care (Volume 2: Treatment of Major Depression) 1993 [Available from: <https://www.ncbi.nlm.nih.gov/books/NBK52234/#!po=16.6667>].
10. Health NCCfM. Management of depression in primary and secondary care 2004 [Available from: <https://www.nice.org.uk/guidance/CG23>].
11. Kennedy SH, Lam RW, Parikh SV, et al. Canadian Network for Mood and Anxiety Treatments (CANMAT) clinical guidelines for the management of major depressive disorder in adults. Introduction. *J Affect Disord* 2009;117 Suppl 1:S1-2. doi: 10.1016/j.jad.2009.06.043
12. Turner EH, Matthews AM, Linardatos E, et al. Selective publication of antidepressant trials and its influence on apparent efficacy. *N Engl J Med* 2008;358(3):252-60. doi: 10.1056/NEJMsa065779
13. Beller EM, Chen JK, Wang UL, et al. Are systematic reviews up-to-date at the time of publication? *Syst Rev* 2013;2:36. doi: 10.1186/2046-4053-2-36 [published Online First: 2013/05/30]
14. Sampson M, Shojania KG, Garritty C, et al. Systematic reviews can be produced and published faster. *J Clin Epidemiol* 2008;61(6):531-6. doi: 10.1016/j.jclinepi.2008.02.004 [published Online First: 2008/05/13]



15. Elliott JH, Turner T, Clavisi O, et al. Living systematic reviews: an emerging opportunity to narrow the evidence-practice gap. *PLoS Med* 2014;11(2):e1001603. doi: 10.1371/journal.pmed.1001603 [published Online First: 2014/02/22]
16. Cipriani A, Furukawa TA, Salanti G, et al. Comparative efficacy and acceptability of 12 new-generation antidepressants: a multiple-treatments meta-analysis. *Lancet* 2009;373(9665):746-58. doi: 10.1016/S0140-6736(09)60046-5 [published Online First: 2009/02/03]
17. Gartlehner G, Hansen RA, Morgan LC, et al. Comparative benefits and harms of second-generation antidepressants for treating major depressive disorder: an updated meta-analysis. *Ann Intern Med* 2011;155(11):772-85. doi: 10.7326/0003-4819-155-11-201112060-00009
18. Forsetlund L, Bjorndal A, Rashidian A, et al. Continuing education meetings and workshops: effects on professional practice and health care outcomes. *Cochrane Database Syst Rev* 2009(2):CD003030. doi: 10.1002/14651858.CD003030.pub2
19. Ivers N, Jamtvedt G, Flottorp S, et al. Audit and feedback: effects on professional practice and healthcare outcomes. *Cochrane Database Syst Rev* 2012(6):CD000259. doi: 10.1002/14651858.CD000259.pub3
20. O'Brien MA, Rogers S, Jamtvedt G, et al. Educational outreach visits: effects on professional practice and health care outcomes. *Cochrane Database Syst Rev* 2007(4):CD000409. doi: 10.1002/14651858.CD000409.pub2
21. Balas EA, Boren SA. Managing Clinical Knowledge for Health Care Improvement. *Yearb Med Inform* 2000(1):65-70.
22. Furukawa TA, Salanti G, Atkinson LZ, et al. Comparative efficacy and acceptability of first-generation and second-generation antidepressants in the acute treatment of major depression: protocol for a network meta-analysis. *BMJ Open* 2016;6(7):e010919. doi: 10.1136/bmjopen-2015-010919 [published Online First: 2016/07/13]
23. Cipriani A, Furukawa TA, Salanti G, et al. Comparative efficacy and acceptability of 21 antidepressant drugs for the acute treatment of adults with major depressive disorder: a systematic review and network meta-analysis. *Lancet* 2018 doi: 10.1016/S0140-6736(17)32802-7 [published Online First: 2018/02/27]
24. Antman EM, Lau J, Kupelnick B, et al. A comparison of results of meta-analyses of randomized control trials and recommendations of clinical experts. Treatments for myocardial infarction. *JAMA* 1992;268(2):240-8. [published Online First: 1992/07/08]
25. Lau J, Antman EM, Jimenez-Silva J, et al. Cumulative meta-analysis of therapeutic trials for myocardial infarction. *N Engl J Med* 1992;327(4):248-54. doi: 10.1056/NEJM199207233270406 [published Online First: 1992/07/23]
26. Rouse B, Cipriani A, Shi Q, et al. Network Meta-analysis for Clinical Practice Guidelines: A Case Study on First-Line Medical Therapies for Primary Open-Angle Glaucoma. *Ann Intern Med* 2016;164(10):674-82. doi: 10.7326/M15-2367 [published Online First: 2016/04/19]
27. Cipriani A, Higgins JP, Geddes JR, et al. Conceptual and technical challenges in network meta-analysis. *Ann Intern Med* 2013;159(2):130-7. doi: 10.7326/0003-4819-159-2-201307160-00008 [published

- 1  
2  
3 Online First: 2013/07/17]
- 4 28. Nikolakopoulou A, Mavridis D, Furukawa TA, et al. Living network meta-analysis compared with pairwise  
5 meta-analysis in comparative effectiveness research: empirical study. *BMJ* 2018;360:k585. doi:  
6 10.1136/bmj.k585 [published Online First: 2018/03/02]
- 7  
8  
9 29. Medical Expenditure Panel Survey (MEPS).
- 10 30. Ades AE, Caldwell DM, Reken S, et al. Evidence Synthesis of Treatment Efficacy in Decision Making: A  
11 Reviewer's Checklist. London 2012.
- 12  
13 31. Rutherford BR, Sneed JR, Roose SP. Does study design influence outcome?. The effects of placebo  
14 control and treatment duration in antidepressant trials. *Psychother Psychosom* 2009;78(3):172-81. doi:  
15 10.1159/000209348
- 16  
17 32. Sinyor M, Levitt AJ, Cheung AH, et al. Does inclusion of a placebo arm influence response to active  
18 antidepressant treatment in randomized controlled trials? Results from pooled and meta-analyses. *J*  
19 *Clin Psychiatry* 2010;71(3):270-9. doi: 10.4088/JCP.08r04516blu
- 20  
21 33. Furukawa TA, Cipriani A, Atkinson LZ, et al. Placebo response rates in antidepressant trials: a systematic  
22 review of published and unpublished double-blind randomised controlled studies. *Lancet Psychiatry*  
23 2016;3(11):1059-66. doi: 10.1016/S2215-0366(16)30307-8
- 24  
25 34. Furukawa TA, Leucht S, Atkinson LZ, Ogawa Y, Takeshima N, Hayasaka Y, Chaimani A & Salanti G. Is  
26 placebo response in antidepressant trials rising or not? A re-analysis of datasets to conclude this  
27 long-lasting controversy. (In press). *Evidence-Based Mental Health* 2018
- 28  
29 35. Salanti G, CA, Furukawa TA, Higgins JP, Ogawa Y, Cipriani A & Egger M. Impact of placebo arms on  
30 outcomes in antidepressant trials: Systematic review and meta-regression analysis. (In press).  
31 *International Journal of Epidemiology* 2018
- 32  
33 36. Collaboration TC. Cochrane Handbook for Systematic Reviews of Interventions Version 5.1.0 (updated  
34 March 2011). 2011 [Available from: <http://www.cochrane-handbook.org>.  
35  
36
- 37 37. Salanti ACG. Visualizing assumptions and results in network meta-analysis: The network graphs package.  
38 *Stata Journal, StataCorp LP* 2015;15(4):905-50.
- 39  
40 38. White IR. Network meta-analysis. *Stata Journal, StataCorp LP* 2015;15(4):951-85.
- 41  
42 39. Practice guideline for the treatment of patients with major depressive disorder (revision). American  
43 Psychiatric Association. *Am J Psychiatry* 2000;157(4 Suppl):1-45.
- 44  
45 40. Association AP. Practice Guideline for the Treatment of Patients With Major Depressive Disorder (3rd  
46 Edition) 2010 [Available from: [http://www.psychiatryonline.com/pracGuide/pracGuideTopic\\_7.aspx](http://www.psychiatryonline.com/pracGuide/pracGuideTopic_7.aspx).  
47
- 48 41. NICE. Depression in adults: recognition and management 2010 [Available from:  
49 <https://www.nice.org.uk/guidance/cg90>.  
50
- 51 42. NICE. Depression in adults: treatment and management. 2018
- 52  
53 43. Anderson IM, Nutt DJ, Deakin JF. Evidence-based guidelines for treating depressive disorders with  
54 antidepressants: a revision of the 1993 British Association for Psychopharmacology guidelines. British  
55 Association for Psychopharmacology. *J Psychopharmacol* 2000;14(1):3-20. doi:  
56 10.1177/026988110001400101  
57  
58  
59  
60



- 1  
2  
3 44. Anderson IM, Ferrier IN, Baldwin RC, et al. Evidence-based guidelines for treating depressive disorders  
4 with antidepressants: a revision of the 2000 British Association for Psychopharmacology guidelines. *J*  
5 *Psychopharmacol* 2008;22(4):343-96. doi: 10.1177/0269881107088441  
6  
7 45. BAP. Evidence-based guidelines for treating depressive disorders with antidepressants: A revision of the  
8 2008 British Association for Psychopharmacology guidelines. *J Psychopharmacol* 2015;29(5):459-525.  
9 doi: 10.1177/0269881115581093 [published Online First: 2015/05/15]  
10  
11 46. Kennedy SH, Lam RW, Cohen NL, et al. Clinical guidelines for the treatment of depressive disorders. IV.  
12 Medications and other biological treatments. *Can J Psychiatry* 2001;46 Suppl 1:38S-58S.  
13  
14 47. Lam RW, Kennedy SH, Grigoriadis S, et al. Canadian Network for Mood and Anxiety Treatments  
15 (CANMAT) clinical guidelines for the management of major depressive disorder in adults. III.  
16 Pharmacotherapy. *J Affect Disord* 2009;117 Suppl 1:S26-43. doi: 10.1016/j.jad.2009.06.041  
17  
18 48. Kennedy SH, Lam RW, McIntyre RS, et al. Canadian Network for Mood and Anxiety Treatments (CANMAT)  
19 2016 Clinical Guidelines for the Management of Adults with Major Depressive Disorder: Section 3.  
20 Pharmacological Treatments. *Can J Psychiatry* 2016;61(9):540-60. doi: 10.1177/0706743716659417  
21  
22 49. Lichtenberg FR. Are the benefits of newer drugs worth their cost? Evidence from the 1996 MEPS. *Health*  
23 *Aff (Millwood)* 2001;20(5):241-51.  
24  
25 50. Miller JD, Foster T, Boulanger L, et al. Direct costs of COPD in the U.S.: an analysis of Medical Expenditure  
26 Panel Survey (MEPS) data. *COPD* 2005;2(3):311-8.  
27  
28 51. Sullivan PW, Ghushchyan VH, Slejko JF, et al. The burden of adult asthma in the United States: evidence  
29 from the Medical Expenditure Panel Survey. *J Allergy Clin Immunol* 2011;127(2):363-69 e1-3. doi:  
30 10.1016/j.jaci.2010.10.042  
31  
32 52. FDA. National Drug Code Directory 2018 [Available from:  
33 <https://www.fda.gov/drugs/informationondrugs/ucm142438.htm>.  
34  
35 53. Clemens J, Gottlieb JD. Do Physicians' Financial Incentives Affect Medical Treatment and Patient Health?  
36 *Am Econ Rev* 2014;104(4):1320-49. doi: 10.1257/aer.104.4.1320 [published Online First: 2014/08/30]  
37  
38 54. Yeh JS, Franklin JM, Avorn J, et al. Association of Industry Payments to Physicians With the Prescribing of  
39 Brand-name Statins in Massachusetts. *JAMA Intern Med* 2016;176(6):763-8. doi:  
40 10.1001/jamainternmed.2016.1709 [published Online First: 2016/05/10]  
41  
42  
43  
44  
45  
46  
47  
48  
49  
50  
51  
52  
53  
54  
55  
56  
57  
58  
59  
60

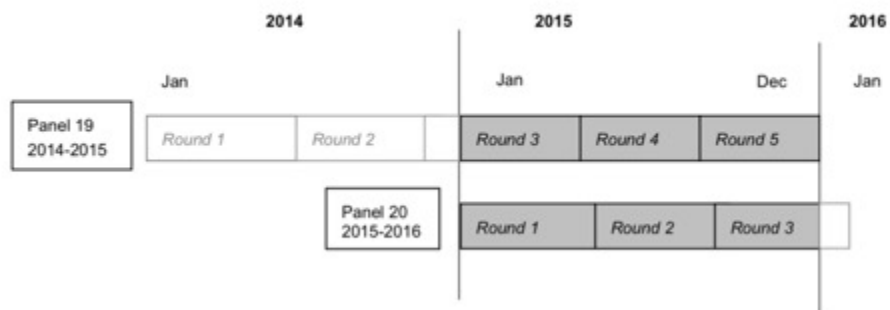

**Figure 1.** Survey structure of 2015 file in MEPS.<sup>29</sup>

171x61mm (72 x 72 DPI)

**PRISMA-P (Preferred Reporting Items for Systematic review and Meta-Analysis Protocols) 2015 checklist: recommended items to address in a systematic review protocol\***

| Section and topic                 | Item No | Checklist item                                                                                                                                                                                                                                           |
|-----------------------------------|---------|----------------------------------------------------------------------------------------------------------------------------------------------------------------------------------------------------------------------------------------------------------|
| <b>ADMINISTRATIVE INFORMATION</b> |         |                                                                                                                                                                                                                                                          |
| Title:                            |         |                                                                                                                                                                                                                                                          |
| Identification                    | 1a      | Identify the report as a protocol of a systematic review                                                                                                                                                                                                 |
| Update                            | 1b      | If the protocol is for an update of a previous systematic review, identify as such                                                                                                                                                                       |
| Registration                      | 2       | If registered, provide the name of the registry (such as PROSPERO) and registration number (UMIN000031898, see Main document Page 2)                                                                                                                     |
| Authors:                          |         |                                                                                                                                                                                                                                                          |
| Contact                           | 3a      | Provide name, institutional affiliation, e-mail address of all protocol authors; provide physical mailing address of corresponding author (see Main document Page 1)                                                                                     |
| Contributions                     | 3b      | Describe contributions of protocol authors and identify the guarantor of the review (see Main document Page 11)                                                                                                                                          |
| Amendments                        | 4       | If the protocol represents an amendment of a previously completed or published protocol, identify as such and list changes; otherwise, state plan for documenting important protocol amendments                                                          |
| Support:                          |         |                                                                                                                                                                                                                                                          |
| Sources                           | 5a      | Indicate sources of financial or other support for the review (see Main document Page 11)                                                                                                                                                                |
| Sponsor                           | 5b      | Provide name for the review funder and/or sponsor (see Main document Page 11)                                                                                                                                                                            |
| Role of sponsor or funder         | 5c      | Describe roles of funder(s), sponsor(s), and/or institution(s), if any, in developing the protocol                                                                                                                                                       |
| <b>INTRODUCTION</b>               |         |                                                                                                                                                                                                                                                          |
| Rationale                         | 6       | Describe the rationale for the review in the context of what is already known (see Main document Page 4)                                                                                                                                                 |
| Objectives                        | 7       | Provide an explicit statement of the question(s) the review will address with reference to participants, interventions, comparators, and outcomes (PICO) (see Main document Page 4)                                                                      |
| <b>METHODS</b>                    |         |                                                                                                                                                                                                                                                          |
| Eligibility criteria              | 8       | Specify the study characteristics (such as PICO, study design, setting, time frame) and report characteristics (such as years considered, language, publication status) to be used as criteria for eligibility for the review (see Main document Page 5) |
| Information sources               | 9       | Describe all intended information sources (such as electronic databases, contact with study authors, trial registers or other grey literature sources) with planned dates of coverage (see Main document Page 5)                                         |
| Search strategy                   | 10      | Present draft of search strategy to be used for at least one electronic database, including planned limits, such that it could be repeated (see Main document Page 6)                                                                                    |
| Study records:                    |         |                                                                                                                                                                                                                                                          |

|                                    |     |                                                                                                                                                                                                                                                                               |
|------------------------------------|-----|-------------------------------------------------------------------------------------------------------------------------------------------------------------------------------------------------------------------------------------------------------------------------------|
| Data management                    | 11a | Describe the mechanism(s) that will be used to manage records and data throughout the review (see Main document Page 6)                                                                                                                                                       |
| Selection process                  | 11b | State the process that will be used for selecting studies (such as two independent reviewers) through each phase of the review (that is, screening, eligibility and inclusion in meta-analysis) (see Main document Page 6)                                                    |
| Data collection process            | 11c | Describe planned method of extracting data from reports (such as piloting forms, done independently, in duplicate), any processes for obtaining and confirming data from investigators (see Main document Page 6)                                                             |
| Data items                         | 12  | List and define all variables for which data will be sought (such as PICO items, funding sources), any pre-planned data assumptions and simplifications (see Main document Page 5-6)                                                                                          |
| Outcomes and prioritization        | 13  | List and define all outcomes for which data will be sought, including prioritization of main and additional outcomes, with rationale (see Main document Page 6)                                                                                                               |
| Risk of bias in individual studies | 14  | Describe anticipated methods for assessing risk of bias of individual studies, including whether this will be done at the outcome or study level, or both; state how this information will be used in data synthesis (see Main document Page 6)                               |
| Data synthesis                     | 15a | Describe criteria under which study data will be quantitatively synthesised (see Main document Page 6-7)                                                                                                                                                                      |
|                                    | 15b | If data are appropriate for quantitative synthesis, describe planned summary measures, methods of handling data and methods of combining data from studies, including any planned exploration of consistency (such as $I^2$ , Kendall's $\tau$ ) (see Main document Page 6-7) |
|                                    | 15c | Describe any proposed additional analyses (such as sensitivity or subgroup analyses, meta-regression) (see Main document Page 6-7)                                                                                                                                            |
|                                    | 15d | If quantitative synthesis is not appropriate, describe the type of summary planned (see Main document Page 6-7)                                                                                                                                                               |
| Meta-bias(es)                      | 16  | Specify any planned assessment of meta-bias(es) (such as publication bias across studies, selective reporting within studies) (see Main document Page 5-6)                                                                                                                    |
| Confidence in cumulative evidence  | 17  | Describe how the strength of the body of evidence will be assessed (such as GRADE) (see Main document Page 6-7)                                                                                                                                                               |

**\* It is strongly recommended that this checklist be read in conjunction with the PRISMA-P Explanation and Elaboration (cite when available) for important clarification on the items. Amendments to a review protocol should be tracked and dated. The copyright for PRISMA-P (including checklist) is held by the PRISMA-P Group and is distributed under a Creative Commons Attribution Licence 4.0.**

*From: Shamseer L, Moher D, Clarke M, Ghersi D, Liberati A, Petticrew M, Shekelle P, Stewart L, PRISMA-P Group. Preferred reporting items for systematic review and meta-analysis protocols (PRISMA-P) 2015: elaboration and explanation. BMJ. 2015 Jan 2;349(jan02 1):g7647.*

# BMJ Open

## Evidence Synthesis, Practice Guidelines and Real-World Prescriptions of New Generation Antidepressants in the Treatment of Depression: A Protocol for Cumulative Network Meta-analyses and Meta-epidemiological Study.

|                                 |                                                                                                                                                                                                                                                                                                                                                                                                                                                                                                                                                                                                                                                                                                                                                                                           |
|---------------------------------|-------------------------------------------------------------------------------------------------------------------------------------------------------------------------------------------------------------------------------------------------------------------------------------------------------------------------------------------------------------------------------------------------------------------------------------------------------------------------------------------------------------------------------------------------------------------------------------------------------------------------------------------------------------------------------------------------------------------------------------------------------------------------------------------|
| Journal:                        | <i>BMJ Open</i>                                                                                                                                                                                                                                                                                                                                                                                                                                                                                                                                                                                                                                                                                                                                                                           |
| Manuscript ID                   | bmjopen-2018-023222.R1                                                                                                                                                                                                                                                                                                                                                                                                                                                                                                                                                                                                                                                                                                                                                                    |
| Article Type:                   | Protocol                                                                                                                                                                                                                                                                                                                                                                                                                                                                                                                                                                                                                                                                                                                                                                                  |
| Date Submitted by the Author:   | 18-Aug-2018                                                                                                                                                                                                                                                                                                                                                                                                                                                                                                                                                                                                                                                                                                                                                                               |
| Complete List of Authors:       | Luo, Yan; School of Public Health in the Graduate School of Medicine, Kyoto University, Department of Health Promotion and Human Behavior<br>Chaimani, Anna; Paris Descartes University; Sorbonne Paris Cité Research Center, METHODS Team, Epidemiology and Statistics<br>Kataoka, Yuki<br>Ostinelli, Edoardo; Università degli Studi di Milano, Department of Health Sciences<br>Ogawa, Yusuke ; School of Public Health in the Graduate School of Medicine, Kyoto University, Department of Health Promotion and Human Behavior<br>Cipriani, Andrea; University of Oxford, Department of Psychiatry<br>Salanti, Georgia; University of Bern, Institute of Social and Preventive Medicine<br>Furukawa, Toshi; Kyoto University, Graduate School of Medicine and School of Public Health |
| <b>Primary Subject Heading</b>: | Evidence based practice                                                                                                                                                                                                                                                                                                                                                                                                                                                                                                                                                                                                                                                                                                                                                                   |
| Secondary Subject Heading:      | Mental health, Public health                                                                                                                                                                                                                                                                                                                                                                                                                                                                                                                                                                                                                                                                                                                                                              |
| Keywords:                       | Network meta-analysis, Practice guidelines, Depression & mood disorders < PSYCHIATRY, Antidepressants                                                                                                                                                                                                                                                                                                                                                                                                                                                                                                                                                                                                                                                                                     |
|                                 |                                                                                                                                                                                                                                                                                                                                                                                                                                                                                                                                                                                                                                                                                                                                                                                           |

SCHOLARONE™  
Manuscripts

**Title page****Title**

Evidence Synthesis, Practice Guidelines and Real-World Prescriptions of New Generation Antidepressants in the Treatment of Depression: A Protocol for Cumulative Network Meta-analyses and Meta-epidemiological Study

**Authors**

Yan Luo<sup>1</sup>, lilacluo@gmail.com

Anna Chaimani<sup>2</sup>, anna.chaimani@parisdescartes.fr

Yuki Kataoka<sup>3</sup>, youkiti@gmail.com

Edoardo G. Ostinelli<sup>4</sup>, edoardo.ostinelli@unimi.it

Yusuke Ogawa<sup>1</sup>, ogawa.yusuke.2u@kyoto-u.ac.jp

Andrea Cipriani<sup>5</sup>, andrea.cipriani@psych.ox.ac.uk

Georgia Salanti<sup>6</sup>, georgia.salanti@ispm.unibe.ch

Toshi A Furukawa<sup>1</sup>, furukawa@kuhp.kyoto-u.ac.jp

**Affiliations**

1. Department of Health Promotion and Human Behavior, School of Public Health in the Graduate School of Medicine, Kyoto University, Kyoto, Japan
2. Paris Descartes University, Paris, France; Epidemiology and Statistics, Sorbonne Paris Cité Research Center, METHODS Team, Paris, France; Cochrane France, Paris, France
3. Hospital Care Research Unit, Hyogo Prefectural Amagasaki General Medical Center, Hyogo, Japan
4. Department of Health Sciences, Università degli Studi di Milano, Milan, Italy
5. Department of Psychiatry, University of Oxford, Oxford, UK
6. Institute of Social and Preventive Medicine, University of Bern, Bern, Switzerland

**Corresponding author**

Toshi A Furukawa, MD, PhD

Department of Health Promotion and Human Behavior, School of Public Health in the Graduate School of Medicine, Kyoto University, Yoshida Konoe-cho, Sakyo-ku, Kyoto 606-8501, Japan

Phone: +81-75-753-9491

Fax: +81-75-753-4641

Email: [furukawa@kuhp.kyoto-u.ac.jp](mailto:furukawa@kuhp.kyoto-u.ac.jp)

**Word count**

3464

## Abstract

### Introduction

Depressive disorders are the most common, burdensome and costly mental disorders. Their treatments have developed through the past decades and we now have more than a dozen new generation antidepressants, while series of guidelines have been published to provide recommendations over the years. However, there still may exist important gaps in this evidence synthesis and implementation process. Systematic reviews may not have been conducted in the most unbiased, informative and timely manners; guidelines may not have reflected the most up-to-date evidence; clinicians may not have changed their clinical decision makings in accordance with the relevant evidence. The aim of this study is to examine the gaps between the ideally synthesized evidence, guideline recommendations and real-world clinical practices in the prescription of new generation antidepressants for major depression through the past three decades.

### Methods and analysis

We will conduct cumulative network meta-analyses (cNMAs) based on the comprehensive systematic review which has identified published and unpublished head-to-head randomized controlled trials comparing the following antidepressants in the acute phase treatment of major depression: agomelatine, amitriptyline, bupropion, citalopram, clomipramine, desvenlafaxine, duloxetine, escitalopram, fluoxetine, fluvoxamine, levomilnacipran, milnacipran, mirtazapine, nefazodone, paroxetine, reboxetine, sertraline, trazodone, venlafaxine, vilazodone and vortioxetine. The primary outcomes will be the proportions of patients who responded (efficacy) and who withdrew from treatment for any reasons (acceptability). We will conduct a random effects cNMA to synthesize evidence and obtain a comprehensive ranking of all new generation antidepressants based on their surface under the cumulative ranking curves. We will identify series of international clinical practice guidelines for the treatment of major depression of adults and summarize their recommendations. We will estimate real-world prescription patterns of antidepressants in the nationally representative samples in USA in the Medical Expenditure Panel Survey. We will compare and evaluate the gaps between the rankings according to cNMAs conducted at 5-year intervals between 1990 and 2015, recommendations in guidelines published in the ensuing five years, and actual practices thereafter.

### Ethics and dissemination

This review does not require ethical approval. We will disseminate our findings through publications in peer-reviewed journals and presentations at conferences.

### Trial registration number

UMIN000031898.

### Strengths and limitations

- This is one of the first studies to directly compare evidence derived from network meta-analyses,

1  
2  
3 recommendations from guidelines, and real-world clinical practices.

- 4 • This study will show where the gaps may lie and how big they are, which can inform future  
5 efforts to bridge the gaps from scientific evidence to real-world clinical practices.
- 6  
7 • The cumulative network meta-analysis used in this study may evolve into prospectively  
8 designed sequential network meta-analysis which can be used as living accumulation of  
9 evidence and contribute to living guidelines.
- 10  
11 • A major limitation of our study is that the real-world practices in nationally representative  
12 samples are available for USA only.  
13  
14  
15  
16  
17  
18  
19  
20  
21  
22  
23  
24  
25  
26  
27  
28  
29  
30  
31  
32  
33  
34  
35  
36  
37  
38  
39  
40  
41  
42  
43  
44  
45  
46  
47  
48  
49  
50  
51  
52  
53  
54  
55  
56  
57  
58  
59  
60

For peer review only



## INTRODUCTION

Evidence-based medicine (EBM) is widely regarded as the guiding principle of today's medical practices, for it can help integrate patients' values, physicians' experiences and scientific evidence derived from large scale research to inform clinical decision-making.<sup>1</sup> To promote EBM, systematic reviews (SRs) including meta-analyses (MAs) should be conducted to produce a comprehensive summary of all relevant studies, clinical practice guidelines (CPGs) will be proposed based on such evidence synthesis, and physicians must update their shared decision making processes in accordance with such guidelines.<sup>2</sup>

Depressive disorders are the most common mental disorders, making them the second leading cause of disability accounting for 8.2% of all years lived with disability (YLDs) in 2010.<sup>3-5</sup> Reflecting the high prevalence of major depressive disorder (MDD) among people of working ages and the resulting dysfunctions, their economic burden was estimated at US \$210.5 billion in US alone in 2010.<sup>6</sup> Antidepressants are widely used in the treatment of MDD, and a host of new generation antidepressants have been approved into the market in the past two to three decades. Given the enormity of burdens due to MDD on patients and society, various institutions worldwide have produced clinical practice guidelines (CPGs) for physicians. It was as early as in 1993 that American Psychiatric Association (APA)<sup>7</sup>, British Association for Psychopharmacology (BAP)<sup>8</sup> and Agency for Health Care Policy and Research (AHCPR)<sup>9</sup> proposed the first version of their guidelines, followed by other associations like National Institute for Health and Care Excellence (NICE) from UK<sup>10</sup> and Canadian Network for Mood and Anxiety Treatments (CANMAT) from Canada<sup>11</sup>. Most of these guidelines have been updated every several years since.

However there are still several important barriers that may impede physicians and patients from making optimal clinical decisions. First, it has become increasingly known that a substantive amount of trials of antidepressants remain unpublished and were not included in contemporary SRs, a fact which most likely introduces publication bias into the results of SRs and thus undermines the credibility of guidelines.<sup>12</sup> Second, it has been reported that there is approximately eight months to more than one year's lag between the last search date in the literature and the publication of an SR,<sup>13</sup> and in total 2.5-6.5 years' interval between the publication dates of the latest primary studies and the publication date of SRs.<sup>15</sup> It was estimated that 7% of the published SRs were already out of date at the time of publication<sup>16</sup>. Third, few of the available CPGs provide specific and precise recommendations in the choice of antidepressants, as pooled evidence has been given conflicting interpretations.<sup>17,18</sup> Fourth, physicians' behaviors are notoriously difficult to influence.<sup>19-21</sup> The road from randomized evidence to actual practices thus appears formidable.<sup>22</sup>

The aim of the present study is to examine how the accumulating body of evidence should have been assembled, and reflected in guidelines, and then transferred into real practices in the prescription of new generation antidepressants for MDD through the past three decades. The evidence we will consider comes from a uniquely comprehensive dataset prepared by GRISelda (Group of Researchers Investigating Specific Efficacy of individual Drugs for Acute depression).<sup>23,24</sup> It

1  
2  
3 comprises data from 522 published and unpublished double-blind randomized controlled trials of  
4 new generation and other antidepressants in the acute treatment of depression. Capitalizing on this,  
5 we will use cumulative network analysis (cNMA) to summarize the development of accumulated  
6 evidence over time.<sup>25-27</sup> When two or more treatment alternatives are available, as in the case of  
7 MDD, NMA can summarize the relative effects of all treatments options by combining both direct  
8 and indirect comparisons<sup>28</sup>; because they utilize all direct and indirect evidence, they can produce  
9 strong evidence concerning relative efficacy more often and earlier than conventional, pairwise  
10 meta-analyses<sup>29</sup>. We will examine the specific recommendations in the internationally representative  
11 CPGs. The real-world prescription practices will be collated from Medical Expenditure Panel Survey  
12 (MEPS) in USA, which is a large-scale yearly healthcare survey of representative samples of  
13 families and individuals in the United States.<sup>30</sup> We predict that there are important gaps in the  
14 evidence synthesis and implementation process. Our study will evaluate and narratively summarize  
15 how big these gaps are and where mainly they exist, and will provide valuable information necessary  
16 to direct future paths to bridge the gaps from scientific evidence to real-world clinical practice.  
17  
18  
19  
20  
21  
22  
23  
24

## 25 **METHODS**

### 26 **Systematic reviews of RCTs of new generation antidepressants and cumulative network** 27 **meta-analysis**

#### 28 *Study eligibility*

29  
30 The cNMAs in this study will be based on the systematic review which has identified all published  
31 and unpublished double-blinded head-to-head RCTs comparing any of the following new generation  
32 antidepressants in the acute phase treatment of adults with MDD up to January 2016<sup>23 24</sup>: we will  
33 consider all new generation antidepressants approved by drug agencies of US, Europe or Japan  
34 including agomelatine, bupropion, citalopram, desvenlafaxine, duloxetine, escitalopram, fluoxetine,  
35 fluvoxamine, levomilnacipran, milnacipran, mirtazapine, paroxetine, reboxetine, sertraline,  
36 venlafaxine, vilazodone and vortioxetine.  
37

38 The GRISelda dataset also contains two older tricyclic antidepressants (TCAs) recommended by  
39 WHO Model List of Essential Medicines (amitriptyline and clomipramine) and two drugs with  
40 distinct effect and side-effect profiles (trazodone and nefazodone): they will constitute evidence set<sup>31</sup>  
41 in the NMAs which serves to connect and strengthen the network.  
42

43 We will include in the meta-analysis only study arms which administered the drugs within dose  
44 ranges approved by the regulatory agencies. Because the inclusion of placebo-controlled trials may  
45 violate the transitivity assumption of NMA in depression studies<sup>32-36</sup>, and because we will be  
46 comparing the evidence from cNMA with real-world practice, we will only include RCTs comparing  
47 active drugs and exclude placebo-controlled studies in the current cNMAs.  
48  
49  
50  
51  
52  
53  
54  
55  
56  
57

### *Study identification and data extraction*

GRISELDA has searched the following databases without language restrictions for published articles: Cochrane Central Register of Controlled Trials (CENTRAL), CINAHL, EMBASE, LiLACS, MEDLINE, MEDLINE In-Process, and PsycINFO up to January 2016. We performed manual searches of references of included articles. We also searched for published, unpublished and ongoing RCTs in drug-approval agencies' documents, company websites, international trial registries, and through contact with pharmaceutical companies and other relevant organizations. Where necessary, we contacted study authors directly to get supplementary materials for further information. The risk of bias of each included study was assessed according to the guide proposed in the Cochrane Collaboration Handbook.<sup>37</sup>

Study identification, data extraction and risk of bias assessment of the included studies were all performed independently by two researchers, and any disagreements were resolved through discussion or in consultation with a third reviewer. For further details of the systematic review process, please see the published protocol and the main GRISELDA paper.<sup>23 24</sup>

### *Statistical analyses*

We will conduct cNMA every 5 years in consideration of the speed of accumulating new trials and publication of guidelines for MDD. According to previous studies which indicated that the latest search of database was about one year before publication of SRs,<sup>13-15</sup> cNMA at any time point will include all trials completed up to 1 year before that date. For trials whose completion year is not available, publication date will be used; when neither is known, the date of approval of the drug by regulatory agencies will be used as the study completion date. Thus studies with a known completion year before the proposed cNMA will be included in the relevant cNMA even if the data were published after that year. Only such cNMA can present the best available, publication bias-free evidence, upon which practice guidelines should ideally be founded.

For network meta-analysis, transitivity assumption is the principle. Since we have confirmed the transitivity assumption of the whole data set in the final network meta-analysis<sup>24</sup>, we will not validate it at every time point re-analysis. In our previous study, we investigated the distribution of the following potential effect modifiers across treatment comparison: (1) study year; (2) sponsorship; (3) depressive severity at baseline; (4) dosing schedule; (5) proportion of participants allocated to placebo; (6) number of recruiting centers (single-center vs multi-centric studies). We evaluated consistency and heterogeneity in the entire network using various tests and metrics and we have found little evidence of inconsistency and heterogeneity.<sup>24</sup>

Our primary outcomes are (i) efficacy of the intervention in terms of response rate defined as the proportion of patients who showed a reduction of at least 50% on the total depression severity score compared to baseline, and (ii) acceptability of the intervention in terms of all-cause discontinuation rate defined as the proportion of patients who leave the study early for any reason. We have extracted

1  
2  
3 the outcome data at a time point as close to 8 weeks as possible: if outcomes at 8 weeks were not  
4 available, we recorded data between 4 and 12 weeks.

5  
6 We will not adjust for multiple comparisons in successive NMAs as we are not testing particular  
7 hypotheses for specific comparisons among antidepressants.

8  
9 We will use the surface under the cumulative ranking curve (SUCRA) to estimate ranking  
10 probabilities for each intervention with regard to the two primary outcomes. We will show ranked  
11 forest plots of ORs with 95% CI in comparison with a common comparator as a sensitivity analysis:  
12 we will use fluoxetine as the common comparator as it is the most frequently used drug in the trials  
13 network.<sup>24</sup>

14  
15 We will use STATA (Stata Corp 2015. Stata Statistical Software: Release 14. College Station, TX:  
16 StataCorp) to conduct cNMA.<sup>38 39</sup>

### 20 **Identification and extraction of recommendations in guidelines**

21 We will use a series of CPGs as our benchmark in comparisons. English written guidelines proposed  
22 by government agencies (such as National Institute for Health and Care Excellence), or professional  
23 academic societies (such as American Psychiatric Association) will be included. Due to the  
24 ambiguity and subjectivity associated with the Appraisal of Guidelines Research and Evaluation II  
25 (AGREE II) instrument for quality assessment of guidelines<sup>40</sup>, we will not apply AGREE instrument  
26 in the appraisal of guidelines, but we will describe the methodology of each guideline development  
27 in supplementary materials. As a result, we will extract recommendations for specific antidepressants  
28 or for specific classes of antidepressants from internationally representative guidelines listed below:  
29  
30  
31

- 32 1) Practice guidelines for the treatment of patients with major depressive disorder published  
33 by American Psychiatric Association (APA), in 1993, 2000, 2010 respectively.<sup>7 41 42</sup>
- 34 2) Guidelines for management of depression proposed by National Institute for Health and  
35 Care Excellence (NICE), in 2004, 2009 and 2018.<sup>10 43 44</sup>
- 36 3) Guidelines for treating depressive disorders with antidepressants proposed by British  
37 Association for Psychopharmacology (BAP), in 1993, 2000, 2008 and 2015.<sup>8 45-47</sup>
- 38 4) Clinical practice guidelines for treatment of major depression proposed by Agency for  
39 Health Care Policy and Research (AHCPR) in 1993.<sup>9</sup>

40  
41 We will extract recommendations with respect to acute phase treatment for adult patients with a  
42 primary diagnosis of unipolar non-psychotic major depression. We define recommendations as  
43 statements used in CPGs involving the words like “recommend”, “must”, “necessary”, “should”,  
44 “appropriate” or other words indicating instructions from guidelines. Basic information of the  
45 guideline (institution, year, targeted patients, diagnostic criteria, etc.), pharmacotherapy  
46 recommendations as acute phase treatment (particular drugs and categories recommended and least  
47 recommended, severity of the disease, etc.), pharmacotherapy recommendations for patients who  
48 have no satisfactory response to initial treatment will be recorded in detail, in order to be compared  
49 with results from cNMA and real world. We will also collect the quality of evidence and strength of  
50  
51  
52  
53  
54  
55  
56

1  
2  
3 recommendations backing extracted recommendations. Two researchers will independently identify  
4 recommendations and extract information from CPGs. Any disagreement will be resolved through  
5 discussion or in consultation with a third researcher.  
6  
7

### 8 **Real-world prescriptions data extraction**

9  
10 We will extract real-world prescription data from the Medical Expenditure Panel Survey (MEPS)  
11 database.<sup>30</sup> MEPS is a database composed of large-scale surveys of families and individuals and their  
12 medical providers, collecting data on the use of specific health services, the cost, and the health  
13 insurance in the United States. The survey started in 1996. MEPS has two major components, the  
14 household component and the insurance component, both of which provide data on a yearly basis. In  
15 the household component a representative sample of families and individuals are interviewed every  
16 year and detailed information including demographic characteristics, health status, use of medical  
17 services, specific medications, cost for each person is collected. Each annual MEPS household  
18 sample size is about 15,000 households. This set of households is a subsample of households  
19 participating in the previous year's National Health Interview Survey (NHIS) led by the National  
20 Center for Health Statistics. The NHIS sampling frame gives a nationally representative sample of  
21 the non-institutionalized population in the US, and oversamples of Blacks and Hispanics. In 2006,  
22 after implementing a new sample design, Asian population has been included in order to deal with  
23 the oversampling issues. To correct for oversampling and for non-response, each participant is given  
24 a weight adjusting for nonresponse over time and some poststratification variables (region,  
25 race/ethnicity, sex, age, poverty status and etc.), in order to produce national estimates.<sup>30</sup> MEPS  
26 database has been used for the analysis of health expenditures and real-world prescriptions of  
27 specific drugs in several studies.<sup>48-50</sup>  
28  
29  
30  
31  
32  
33  
34  
35  
36

### 37 *Participants*

38 We will include those who have been classified as “Depressive disorders” in the category of “657  
39 Mood disorder”, of either sex and aged 18 years or older. The corresponding ICD-10 numbers are:  
40 29620 29621 29622 29623 29624 29625 29626 29630 29631 29632 29633 29634 29635 29636 311.  
41 MEPS database only code the diagnosis for the first 3 digits using ICD numbers (296, 311).  
42  
43  
44

### 45 *Interventions*

46 Of the 21 antidepressants included in the GRISELDA network, the following drugs will not be  
47 included among the drugs prescribed for depressive disorders in MEPS: agomelatine and reboxetine  
48 have not been approved by FDA for marketing in USA, fluvoxamine has an indication for  
49 obsessive-compulsive disorder but not for depression, and milnacipran for fibromyalgia only. On the  
50 other hand, there are many antidepressants, other than new generation antidepressants, which may  
51 have been prescribed especially in older days, such as imipramine, desipramine, doxepin or  
52 nortriptyline. Although our focus of comparison is new generation antidepressants, we will extract  
53  
54  
55  
56  
57  
58  
59  
60



1  
2  
3 the frequency of prescription of all antidepressants in the MEPS study. Using the National Drug  
4 Code Directory<sup>51</sup>, which included all registered drugs in FDA, we identified all antidepressants ever  
5 used in the USA as the following: 1) Tricyclic Antidepressants [EPC]: amitriptyline, amoxapine,  
6 clomipramine, desipramine, doxepin, imipramine, nortriptyline, protriptyline, trimipramine; 2)  
7 Serotonin Reuptake Inhibitor [EPC]: citalopram, escitalopram, fluoxetine, nefazodone, paroxetine,  
8 sertraline, trazodone; 3) Serotonin and Norepinephrine Reuptake Inhibitor [EPC]: desvenlafaxine,  
9 duloxetine, venlafaxine, levomilnacipran; 4) No Pharm Class: bupropion, mirtazapine, vilazodone,  
10 vortioxetine. All the 24 listed antidepressants will be searched in MEPS during data extraction.  
11  
12  
13  
14  
15

### 16 *Data extraction*

17 We will extract prescription data for antidepressants listed above in the year 1996, 2000, 2005, 2010  
18 and 2015 (Table 1). Since diagnostic labels available MEPS data cannot distinguish unipolar  
19 depression from bipolar depression and psychotic depression, both of which require different drug  
20 treatments than unipolar depression, we will exclude those patients who are concomitantly taking  
21 mood stabilizers or any antipsychotics. According to the National Drug Code Directory<sup>51</sup>, Mood  
22 Stabilizer [EPC] include: carbamazepine, divalproex, lamotrigine, lithium, valproate, valproic acid;  
23 and Phenothiazine [EPC], Typical Antipsychotics [EPC] and Atypical Antipsychotics [EPC] include:  
24 aripiprazole, asenapine, brexipiprazole, cariprazine, chlorpromazine, clozapine, fluphenazine,  
25 haloperido, iloperidone, loxapine, lurasidone, molindone, olanzapine, paliperidone, perphenazine,  
26 pimavanserin, quetiapine, risperidone, thioridazine, thiothixene, ziprasidone. We will exclude all  
27 participants taking any of these drugs concomitantly with an antidepressant.  
28  
29  
30  
31

32 Every participant in one MEPS cohort (called 'panel' in MEPS) is interviewed five times (called  
33 'rounds') for 2 years. For example, the file of 2015 contains the 2015 portion of Round 3 and Rounds  
34 4 and 5 for Panel 19, as well as Rounds 1, 2 and the 2015 portion of Round 3 for Panel 20 (see  
35 Figure 1).<sup>30</sup> We will check the prescription of antidepressants at round 2 from panel 20 and round 4  
36 from panel 19 (similar patterns in other given years), because each participant, either from panel 19  
37 or 20, must have this intermediate round of interview within 2015, and we will use it as a  
38 cross-sectional investigation. We will use the total number of patients with the diagnosis of  
39 depression and who are on antidepressant monotherapy but not taking mood stabilizers and  
40 antipsychotics (listed above) concomitantly at this round as denominator, and the prescription for a  
41 particular drug as monotherapy as numerator. Given lack of precise information for medication  
42 schedule (e.g. start time of diagnosis, primary medication, time of start and change of medication),  
43 we will not be able to restrict the prescriptions to inception prescriptions in the acute phase treatment  
44 of MDD, and the results will include both incident and prevalent uses. As MEPS data set give each  
45 participant a sample weight according to nonresponse and poststratification variables, we will use the  
46 sample weights to estimate the nationally representative number of patients on a specific therapy.  
47 Finally the ranking of the of prescriptions will then be based on the estimated numbers of  
48 prescriptions in the general US population.  
49  
50  
51  
52  
53  
54  
55  
56

We will use Python 3.6 to extract data from MEPS dataset.

### Comparison between cNMA, CPGs, and real-world prescriptions

We propose that a cNMA at a specific time point (e.g. 2000) should be taken as a reference for any guidelines that are going to be published in the next five years (e.g. 2000 through 2004), and then inform real world prescriptions afterwards (e.g. 2005 and after). We will therefore compare the results of NMA, CPG recommendations and real-world practice in these corresponding years, and the trend between these time points will also be taken into considerations. Table 1 shows the time periods for comparisons. We will assess if the recommendable sets estimated from cNMA (i.e. drugs which have good balance between efficacy and acceptability) are reflected in the drugs recommended by guidelines, which then will be compared with the rankings in actual clinical practice. Moreover, as MEPS is a database from the US, we will attempt to compare results from MEPS with the US guidelines APA. We will describe the possible differences and explore the time lag from the ideally available evidence to guideline recommendations and from guideline recommendations to the real world practices. We will also investigate the potential factors which may influence the actual prescriptions including side-effects profiles of specific drugs, year of FDA approval, the price of the drug while on patent, and the year of patent expiration of each drug.

**Table 1. Time periods for comparisons in our study.**

| Trials (completion year*) | Cumulative NMAs | CPGs (publication year) | Real world prescriptions (MEPS data file year) |
|---------------------------|-----------------|-------------------------|------------------------------------------------|
| ~present                  | present         | 2016~present            | -                                              |
| ~2009                     | 2010            | 2010~2014               | 2015                                           |
| ~2004                     | 2005            | 2005~2009               | 2010                                           |
| ~1999                     | 2000            | 2000~2004               | 2005                                           |
| ~1994                     | 1995            | 1995~1999               | 2000                                           |
| ~1989                     | 1990            | 1990~1994               | 1996**                                         |

\* For trials whose completion year is not available, publication date will be used; when neither is known, the date of approval of the drug by regulatory agencies will be used as its completion date.

\*\*As MEPS database started with 1996, so we will use data from 1996 for the analysis of prescriptions.

### Patient and public involvement

This research protocol was written without patient involvement. Patients were not invited to comment on the study design and were not consulted to develop patient relevant outcomes or interpret the results. Patients were not expected to contribute to conducting this study and to the writing of this document for readability or accuracy.

## DISCUSSION

We have presented the study protocol for investigating the gaps between ideally synthesized evidence, guideline recommendations and real-world clinical practices in the prescriptions of new generation antidepressants for unipolar major depressive disorders.

Our study has several strengths. It is one of the first studies to make comparisons between pooled evidence derived from cumulative network meta-analyses, recommendations from guidelines, and real-world clinical practices. In the cNMA, we will use the comprehensive dataset from our previous study<sup>24</sup>, which included both published and unpublished trials. And we will use MEPS database, which collect detailed information of health status and specific medications from a representative sample in the US, as a reflection of real world prescription profile. We expect this study to show the gaps between evidence and practice, and our findings will inform future developments of evidence-based medicine. For instance, the cNMA used in this study may eventually evolve into prospectively designed sequential network meta-analysis which can be used to continuously update evidence and contribute to living guidelines, which is a guideline that is updated as soon as new evidence becomes available, so that it can provide timely and trustworthy suggestions for decision-makers.<sup>15 52 53</sup>

There are some limitations to our study. First, MEPS does not allow us to extract very precise information, including whether the antidepressant is being used as first-line or later treatments. This may lower the comparability between the cNMA of acute phase treatment studies of unipolar depression and the real world practices, as patients on continuation/maintenance treatment may continue using the same antidepressants after guideline recommendations for acute phase treatment change. However, it must be noted that three quarters of patients who initiate antidepressant treatment discontinue the drug within 90 days<sup>54</sup>, suggesting that the majority of the patients in MEPS database represent initial prescriptions. Second, MEPS is a US database so we will not be able to make comparisons between guideline recommendations and actual practices in other countries. Lastly, the reasons behind the differences between evidence and practice may be very complicated and we will need to factor in various potential confounding factors such as the side-effects, marketing efforts of pharmaceutical companies and local regulations such as price or patent status of a particular drug.<sup>15 55 56</sup>

In conclusion, our study represents a unique inquiry into gaps from evidence to real-world practices, and may provide valuable insights into future developments of EBM.

### Ethics and dissemination

This study does not require institutional review board approval. We have registered it in the University hospital Medical Information Network Clinical Trials Registry (UMIN-CTR): UMIN000031898.



## Funding

This study was supported in part by JSPS Grant-in-Aid for Scientific Research (Grant Number 17k19808) to TAF. The funder has no role in study design, data collection, data analysis, data interpretation, writing of the report, or in the decision to submit for publication.

## Competing interests

TAF has received lecture fees from Janssen, Meiji, Mitsubishi-Tanabe, MSD and Pfizer. He has received research support from Mitsubishi-Tanabe and Mochida. ACi is supported by the NIHR Oxford Cognitive Health Clinical Research Facility, and was expert witness for Accord Healthcare for a patent issue about quetiapine extended release. All the other authors report no competing interests to declare.

## Acknowledgement

We would like to thank all the constructive comments and advices from the members from the meta-epidemiological study group in the School of Public Health, Kyoto University.

## Contributors

YL and TAF conceived the study and drafted the protocol. ACh, YK, EGO, YO, ACi and GS assisted in the study design and critically revised the protocol. All authors gave final approval of the version to be published.

## REFERENCES

1. Djulbegovic B, Guyatt GH. Progress in evidence-based medicine: a quarter century on. *Lancet* 2017;390(10092):415-23. doi: 10.1016/S0140-6736(16)31592-6
2. Haynes RB. Of studies, syntheses, synopses, summaries, and systems: the "5S" evolution of information services for evidence-based healthcare decisions. *Evid Based Med* 2006;11(6):162-4. doi: 10.1136/ebm.11.6.162-a
3. DALYs GBD, Collaborators H, Murray CJ, et al. Global, regional, and national disability-adjusted life years (DALYs) for 306 diseases and injuries and healthy life expectancy (HALE) for 188 countries, 1990-2013: quantifying the epidemiological transition. *Lancet* 2015;386(10009):2145-91. doi: 10.1016/S0140-6736(15)61340-X
4. DALYs GBD, Collaborators H. Global, regional, and national disability-adjusted life-years (DALYs) for 315 diseases and injuries and healthy life expectancy (HALE), 1990-2015: a systematic analysis for the Global Burden of Disease Study 2015. *Lancet* 2016;388(10053):1603-58. doi: 10.1016/S0140-6736(16)31460-X
5. WHO. Depression: fact sheet. Geneva: World Health Organisation, 2017. Sep 21, 2017
6. Ferrari AJ, Charlson FJ, Norman RE, et al. Burden of depressive disorders by country, sex, age, and year: findings from the global burden of disease study 2010. *PLoS Med* 2013;10(11):e1001547. doi: 10.1371/journal.pmed.1001547 [published Online First: 2013/11/14]

- 1
- 2
- 3 7. Practice guideline for major depressive disorder in adults. American Psychiatric Association. *Am J*
- 4 *Psychiatry* 1993;150(4 Suppl):1-26. doi: 10.1176/ajp.150.4.1
- 5
- 6 8. Montgomery SA, Bebbington P, Cowen P, et al. Guidelines for treating depressive illness with
- 7 antidepressants: A statement from the British Association for Psychopharmacology. *J*
- 8 *Psychopharmacol* 1993;7(1 Suppl):19-23. doi: 10.1177/0269881193007001041
- 9
- 10 9. AHCPR Clinical Practice Guidelines N. Depression in Primary Care (Volume 2: Treatment of Major
- 11 Depression) 1993 [Available from: <https://www.ncbi.nlm.nih.gov/books/NBK52234/#!po=16.6667>.
- 12
- 13 10. Health NCCfM. Management of depression in primary and secondary care 2004 [Available from:
- 14 <https://www.nice.org.uk/guidance/CG23>.
- 15
- 16 11. Kennedy SH, Lam RW, Parikh SV, et al. Canadian Network for Mood and Anxiety Treatments (CANMAT)
- 17 clinical guidelines for the management of major depressive disorder in adults. Introduction. *J Affect*
- 18 *Disord* 2009;117 Suppl 1:S1-2. doi: 10.1016/j.jad.2009.06.043
- 19
- 20 12. Turner EH, Matthews AM, Linardatos E, et al. Selective publication of antidepressant trials and its influence
- 21 on apparent efficacy. *N Engl J Med* 2008;358(3):252-60. doi: 10.1056/NEJMsa065779
- 22
- 23 13. Beller EM, Chen JK, Wang UL, et al. Are systematic reviews up-to-date at the time of publication? *Syst Rev*
- 24 2013;2:36. doi: 10.1186/2046-4053-2-36 [published Online First: 2013/05/30]
- 25
- 26 14. Sampson M, Shojania KG, Garrity C, et al. Systematic reviews can be produced and published faster. *J*
- 27 *Clin Epidemiol* 2008;61(6):531-6. doi: 10.1016/j.jclinepi.2008.02.004 [published Online First:
- 28 2008/05/13]
- 29
- 30 15. Elliott JH, Turner T, Clavisi O, et al. Living systematic reviews: an emerging opportunity to narrow the
- 31 evidence-practice gap. *PLoS Med* 2014;11(2):e1001603. doi: 10.1371/journal.pmed.1001603
- 32 [published Online First: 2014/02/22]
- 33
- 34 16. Shojania KG, Sampson M, Ansari MT, et al. How quickly do systematic reviews go out of date? A survival
- 35 analysis. *Ann Intern Med* 2007;147(4):224-33. [published Online First: 2007/07/20]
- 36
- 37 17. Cipriani A, Furukawa TA, Salanti G, et al. Comparative efficacy and acceptability of 12 new-generation
- 38 antidepressants: a multiple-treatments meta-analysis. *Lancet* 2009;373(9665):746-58. doi:
- 39 10.1016/S0140-6736(09)60046-5 [published Online First: 2009/02/03]
- 40
- 41 18. Gartlehner G, Hansen RA, Morgan LC, et al. Comparative benefits and harms of second-generation
- 42 antidepressants for treating major depressive disorder: an updated meta-analysis. *Ann Intern Med*
- 43 2011;155(11):772-85. doi: 10.7326/0003-4819-155-11-201112060-00009
- 44
- 45 19. Forsetlund L, Bjorndal A, Rashidian A, et al. Continuing education meetings and workshops: effects on
- 46 professional practice and health care outcomes. *Cochrane Database Syst Rev* 2009(2):CD003030.
- 47 doi: 10.1002/14651858.CD003030.pub2
- 48
- 49 20. Ivers N, Jamtvedt G, Flottorp S, et al. Audit and feedback: effects on professional practice and healthcare
- 50 outcomes. *Cochrane Database Syst Rev* 2012(6):CD000259. doi: 10.1002/14651858.CD000259.pub3
- 51
- 52 21. O'Brien MA, Rogers S, Jamtvedt G, et al. Educational outreach visits: effects on professional practice and
- 53 health care outcomes. *Cochrane Database Syst Rev* 2007(4):CD000409. doi:
- 54 10.1002/14651858.CD000409.pub2
- 55
- 56
- 57
- 58
- 59
- 60

- 1  
2  
3 22. Balas EA, Boren SA. Managing Clinical Knowledge for Health Care Improvement. *Yearb Med Inform*  
4 2000(1):65-70.  
5  
6 23. Furukawa TA, Salanti G, Atkinson LZ, et al. Comparative efficacy and acceptability of first-generation and  
7 second-generation antidepressants in the acute treatment of major depression: protocol for a network  
8 meta-analysis. *BMJ Open* 2016;6(7):e010919. doi: 10.1136/bmjopen-2015-010919 [published Online  
9 First: 2016/07/13]  
10  
11 24. Cipriani A, Furukawa TA, Salanti G, et al. Comparative efficacy and acceptability of 21 antidepressant  
12 drugs for the acute treatment of adults with major depressive disorder: a systematic review and  
13 network meta-analysis. *Lancet* 2018 doi: 10.1016/S0140-6736(17)32802-7 [published Online First:  
14 2018/02/27]  
15  
16 25. Antman EM, Lau J, Kupelnick B, et al. A comparison of results of meta-analyses of randomized control  
17 trials and recommendations of clinical experts. Treatments for myocardial infarction. *JAMA*  
18 1992;268(2):240-8. [published Online First: 1992/07/08]  
19  
20 26. Lau J, Antman EM, Jimenez-Silva J, et al. Cumulative meta-analysis of therapeutic trials for myocardial  
21 infarction. *N Engl J Med* 1992;327(4):248-54. doi: 10.1056/NEJM199207233270406 [published Online  
22 First: 1992/07/23]  
23  
24 27. Rouse B, Cipriani A, Shi Q, et al. Network Meta-analysis for Clinical Practice Guidelines: A Case Study on  
25 First-Line Medical Therapies for Primary Open-Angle Glaucoma. *Ann Intern Med* 2016;164(10):674-82.  
26 doi: 10.7326/M15-2367 [published Online First: 2016/04/19]  
27  
28 28. Cipriani A, Higgins JP, Geddes JR, et al. Conceptual and technical challenges in network meta-analysis.  
29 *Ann Intern Med* 2013;159(2):130-7. doi: 10.7326/0003-4819-159-2-201307160-00008 [published  
30 Online First: 2013/07/17]  
31  
32 29. Nikolakopoulou A, Mavridis D, Furukawa TA, et al. Living network meta-analysis compared with pairwise  
33 meta-analysis in comparative effectiveness research: empirical study. *BMJ* 2018;360:k585. doi:  
34 10.1136/bmj.k585 [published Online First: 2018/03/02]  
35  
36 30. Quality USAfHRa. Medical Expenditure Panel Survey (MEPS) [Available from:  
37 <https://meps.ahrq.gov/mepsweb/>.]  
38  
39 31. Ades AE, Caldwell DM, Reken S, et al. Evidence Synthesis of Treatment Efficacy in Decision Making: A  
40 Reviewer's Checklist. London2012.  
41  
42 32. Rutherford BR, Sneed JR, Roose SP. Does study design influence outcome?. The effects of placebo  
43 control and treatment duration in antidepressant trials. *Psychother Psychosom* 2009;78(3):172-81. doi:  
44 10.1159/000209348  
45  
46 33. Sinyor M, Levitt AJ, Cheung AH, et al. Does inclusion of a placebo arm influence response to active  
47 antidepressant treatment in randomized controlled trials? Results from pooled and meta-analyses. *J*  
48 *Clin Psychiatry* 2010;71(3):270-9. doi: 10.4088/JCP.08r04516blu  
49  
50 34. Furukawa TA, Cipriani A, Atkinson LZ, et al. Placebo response rates in antidepressant trials: a systematic  
51 review of published and unpublished double-blind randomised controlled studies. *Lancet Psychiatry*  
52 2016;3(11):1059-66. doi: 10.1016/S2215-0366(16)30307-8  
53  
54  
55  
56  
57  
58  
59  
60

- 1  
2  
3 35. Furukawa TA CA, Leucht S, Atkinson LZ, Ogawa Y, Takeshima N, Hayasaka Y, Chaimani A & Salanti G. Is  
4 placebo response in antidepressant trials rising or not? A re-analysis of datasets to conclude this  
5 long-lasting controversy. (In press). *Evidence-Based Mental Health* 2018  
6  
7 36. Salanti G CA, Furukawa TA, Higgins JP, Ogawa Y, Cipriani A & Egger M. Impact of placebo arms on  
8 outcomes in antidepressant trials: Systematic review and meta-regression analysis. (In press).  
9 *International Journal of Epidemiology* 2018  
10  
11 37. Collaboration TC. Cochrane Handbook for Systematic Reviews of Interventions Version 5.1.0 (updated  
12 March 2011). 2011 [Available from: <http://www.cochrane-handbook.org>.  
13  
14 38. Salanti ACG. Visualizing assumptions and results in network meta-analysis: The network graphs package.  
15 *Stata Journal, StataCorp LP* 2015;15(4):905-50.  
16  
17 39. White IR. Network meta-analysis. *Stata Journal, StataCorp LP* 2015;15(4):951-85.  
18  
19 40. Scott NA, Moga C, Harstall C. Making the AGREE tool more user-friendly: the feasibility of a user guide  
20 based on Boolean operators. *J Eval Clin Pract* 2009;15(6):1061-73. doi:  
21 10.1111/j.1365-2753.2009.01265.x [published Online First: 2010/04/07]  
22  
23 41. Practice guideline for the treatment of patients with major depressive disorder (revision). American  
24 Psychiatric Association. *Am J Psychiatry* 2000;157(4 Suppl):1-45.  
25  
26 42. Association AP. Practice Guideline for the Treatment of Patients With Major Depressive Disorder (3rd  
27 Edition) 2010 [Available from: [http://www.psychiatryonline.com/pracGuide/pracGuideTopic\\_7.aspx](http://www.psychiatryonline.com/pracGuide/pracGuideTopic_7.aspx).  
28  
29 43. NICE. Depression in adults: recognition and management 2010 [Available from:  
30 <https://www.nice.org.uk/guidance/cg90>.  
31  
32 44. NICE. Depression in adults: treatment and management. 2018  
33  
34 45. Anderson IM, Nutt DJ, Deakin JF. Evidence-based guidelines for treating depressive disorders with  
35 antidepressants: a revision of the 1993 British Association for Psychopharmacology guidelines. British  
36 Association for Psychopharmacology. *J Psychopharmacol* 2000;14(1):3-20. doi:  
37 10.1177/026988110001400101  
38  
39 46. Anderson IM, Ferrier IN, Baldwin RC, et al. Evidence-based guidelines for treating depressive disorders  
40 with antidepressants: a revision of the 2000 British Association for Psychopharmacology guidelines. *J*  
41 *Psychopharmacol* 2008;22(4):343-96. doi: 10.1177/0269881107088441  
42  
43 47. BAP. Evidence-based guidelines for treating depressive disorders with antidepressants: A revision of the  
44 2008 British Association for Psychopharmacology guidelines. *J Psychopharmacol* 2015;29(5):459-525.  
45 doi: 10.1177/0269881115581093 [published Online First: 2015/05/15]  
46  
47 48. Lichtenberg FR. Are the benefits of newer drugs worth their cost? Evidence from the 1996 MEPS. *Health*  
48 *Aff (Millwood)* 2001;20(5):241-51.  
49  
50 49. Miller JD, Foster T, Boulanger L, et al. Direct costs of COPD in the U.S.: an analysis of Medical Expenditure  
51 Panel Survey (MEPS) data. *COPD* 2005;2(3):311-8.  
52  
53 50. Sullivan PW, Ghushchyan VH, Slejko JF, et al. The burden of adult asthma in the United States: evidence  
54 from the Medical Expenditure Panel Survey. *J Allergy Clin Immunol* 2011;127(2):363-69 e1-3. doi:  
55 10.1016/j.jaci.2010.10.042  
56  
57  
58  
59  
60

- 1  
2  
3 51. FDA. National Drug Code Directory 2018 [Available from:  
4 <https://www.fda.gov/drugs/informationondrugs/ucm142438.htm>.  
5  
6 52. Akl EA, Meerpohl JJ, Elliott J, et al. Living systematic reviews: 4. Living guideline recommendations. *J Clin*  
7 *Epidemiol* 2017;91:47-53. doi: 10.1016/j.jclinepi.2017.08.009 [published Online First: 2017/09/16]  
8  
9 53. Elliott JH, Synnot A, Turner T, et al. Living systematic review: 1. Introduction-the why, what, when, and how.  
10 *J Clin Epidemiol* 2017;91:23-30. doi: 10.1016/j.jclinepi.2017.08.010 [published Online First:  
11 2017/09/16]  
12  
13 54. Olfson M, Marcus SC, Tedeschi M, et al. Continuity of antidepressant treatment for adults with depression  
14 in the United States. *Am J Psychiatry* 2006;163(1):101-8. doi: 10.1176/appi.ajp.163.1.101 [published  
15 Online First: 2006/01/05]  
16  
17 55. Clemens J, Gottlieb JD. Do Physicians' Financial Incentives Affect Medical Treatment and Patient Health?  
18 *Am Econ Rev* 2014;104(4):1320-49. doi: 10.1257/aer.104.4.1320 [published Online First: 2014/08/30]  
19  
20 56. Yeh JS, Franklin JM, Avorn J, et al. Association of Industry Payments to Physicians With the Prescribing of  
21 Brand-name Statins in Massachusetts. *JAMA Intern Med* 2016;176(6):763-8. doi:  
22 10.1001/jamainternmed.2016.1709 [published Online First: 2016/05/10]  
23  
24  
25  
26

27 Figure legend: **Figure 1.** Survey structure of 2015 file in MEPS.<sup>30</sup>  
28  
29  
30  
31  
32  
33  
34  
35  
36  
37  
38  
39  
40  
41  
42  
43  
44  
45  
46  
47  
48  
49  
50  
51  
52  
53  
54  
55  
56  
57  
58  
59  
60

1  
2  
3  
4  
5  
6  
7  
8  
9  
10  
11  
12  
13  
14  
15  
16  
17  
18  
19  
20  
21  
22  
23  
24  
25  
26  
27  
28  
29  
30  
31  
32  
33  
34  
35  
36  
37  
38  
39  
40  
41  
42  
43  
44  
45  
46  
47  
48  
49  
50  
51  
52  
53  
54  
55  
56  
57  
58  
59  
60

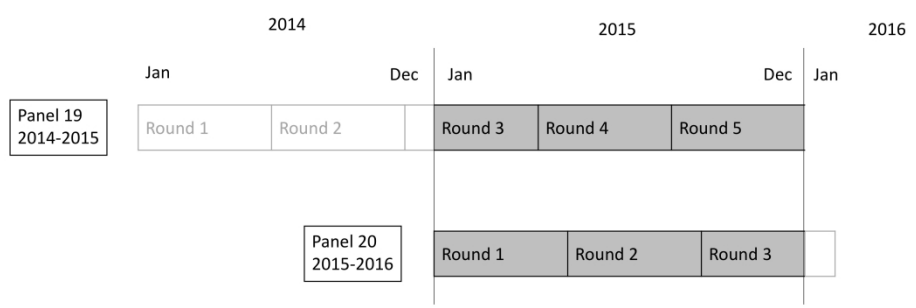

Figure 1. Survey structure of 2015 file in MEPS.<sup>30</sup>

338x190mm (300 x 300 DPI)

**PRISMA-P (Preferred Reporting Items for Systematic review and Meta-Analysis Protocols) 2015 checklist: recommended items to address in a systematic review protocol\***

| Section and topic                 | Item No | Checklist item                                                                                                                                                                                                                                           |
|-----------------------------------|---------|----------------------------------------------------------------------------------------------------------------------------------------------------------------------------------------------------------------------------------------------------------|
| <b>ADMINISTRATIVE INFORMATION</b> |         |                                                                                                                                                                                                                                                          |
| Title:                            |         |                                                                                                                                                                                                                                                          |
| Identification                    | 1a      | Identify the report as a protocol of a systematic review                                                                                                                                                                                                 |
| Update                            | 1b      | If the protocol is for an update of a previous systematic review, identify as such                                                                                                                                                                       |
| Registration                      | 2       | If registered, provide the name of the registry (such as PROSPERO) and registration number (UMIN000031898, see Main document Page 2)                                                                                                                     |
| Authors:                          |         |                                                                                                                                                                                                                                                          |
| Contact                           | 3a      | Provide name, institutional affiliation, e-mail address of all protocol authors; provide physical mailing address of corresponding author (see Main document Page 1)                                                                                     |
| Contributions                     | 3b      | Describe contributions of protocol authors and identify the guarantor of the review (see Main document Page 11)                                                                                                                                          |
| Amendments                        | 4       | If the protocol represents an amendment of a previously completed or published protocol, identify as such and list changes; otherwise, state plan for documenting important protocol amendments                                                          |
| Support:                          |         |                                                                                                                                                                                                                                                          |
| Sources                           | 5a      | Indicate sources of financial or other support for the review (see Main document Page 11)                                                                                                                                                                |
| Sponsor                           | 5b      | Provide name for the review funder and/or sponsor (see Main document Page 11)                                                                                                                                                                            |
| Role of sponsor or funder         | 5c      | Describe roles of funder(s), sponsor(s), and/or institution(s), if any, in developing the protocol                                                                                                                                                       |
| <b>INTRODUCTION</b>               |         |                                                                                                                                                                                                                                                          |
| Rationale                         | 6       | Describe the rationale for the review in the context of what is already known (see Main document Page 4)                                                                                                                                                 |
| Objectives                        | 7       | Provide an explicit statement of the question(s) the review will address with reference to participants, interventions, comparators, and outcomes (PICO) (see Main document Page 4)                                                                      |
| <b>METHODS</b>                    |         |                                                                                                                                                                                                                                                          |
| Eligibility criteria              | 8       | Specify the study characteristics (such as PICO, study design, setting, time frame) and report characteristics (such as years considered, language, publication status) to be used as criteria for eligibility for the review (see Main document Page 5) |
| Information sources               | 9       | Describe all intended information sources (such as electronic databases, contact with study authors, trial registers or other grey literature sources) with planned dates of coverage (see Main document Page 5)                                         |
| Search strategy                   | 10      | Present draft of search strategy to be used for at least one electronic database, including planned limits, such that it could be repeated (see Main document Page 6)                                                                                    |
| Study records:                    |         |                                                                                                                                                                                                                                                          |



|    |                                    |     |                                                                                                                                                                                                                                                                               |
|----|------------------------------------|-----|-------------------------------------------------------------------------------------------------------------------------------------------------------------------------------------------------------------------------------------------------------------------------------|
| 5  | Data management                    | 11a | Describe the mechanism(s) that will be used to manage records and data throughout the review (see Main document Page 6)                                                                                                                                                       |
| 7  | Selection process                  | 11b | State the process that will be used for selecting studies (such as two independent reviewers) through each phase of the review (that is, screening, eligibility and inclusion in meta-analysis) (see Main document Page 6)                                                    |
| 9  | Data collection process            | 11c | Describe planned method of extracting data from reports (such as piloting forms, done independently, in duplicate), any processes for obtaining and confirming data from investigators (see Main document Page 6)                                                             |
| 11 | Data items                         | 12  | List and define all variables for which data will be sought (such as PICO items, funding sources), any pre-planned data assumptions and simplifications (see Main document Page 5-6)                                                                                          |
| 13 | Outcomes and prioritization        | 13  | List and define all outcomes for which data will be sought, including prioritization of main and additional outcomes, with rationale (see Main document Page 6)                                                                                                               |
| 15 | Risk of bias in individual studies | 14  | Describe anticipated methods for assessing risk of bias of individual studies, including whether this will be done at the outcome or study level, or both; state how this information will be used in data synthesis (see Main document Page 6)                               |
| 17 | Data synthesis                     | 15a | Describe criteria under which study data will be quantitatively synthesised (see Main document Page 6-7)                                                                                                                                                                      |
| 18 |                                    | 15b | If data are appropriate for quantitative synthesis, describe planned summary measures, methods of handling data and methods of combining data from studies, including any planned exploration of consistency (such as $I^2$ , Kendall's $\tau$ ) (see Main document Page 6-7) |
| 21 |                                    | 15c | Describe any proposed additional analyses (such as sensitivity or subgroup analyses, meta-regression) (see Main document Page 6-7)                                                                                                                                            |
| 23 |                                    | 15d | If quantitative synthesis is not appropriate, describe the type of summary planned (see Main document Page 6-7)                                                                                                                                                               |
| 24 | Meta-bias(es)                      | 16  | Specify any planned assessment of meta-bias(es) (such as publication bias across studies, selective reporting within studies) (see Main document Page 5-6)                                                                                                                    |
| 26 | Confidence in cumulative evidence  | 17  | Describe how the strength of the body of evidence will be assessed (such as GRADE) (see Main document Page 6-7)                                                                                                                                                               |

**\* It is strongly recommended that this checklist be read in conjunction with the PRISMA-P Explanation and Elaboration (cite when available) for important clarification on the items. Amendments to a review protocol should be tracked and dated. The copyright for PRISMA-P (including checklist) is held by the PRISMA-P Group and is distributed under a Creative Commons Attribution Licence 4.0.**

*From: Shamseer L, Moher D, Clarke M, Ghersi D, Liberati A, Petticrew M, Shekelle P, Stewart L, PRISMA-P Group. Preferred reporting items for systematic review and meta-analysis protocols (PRISMA-P) 2015: elaboration and explanation. BMJ. 2015 Jan 2;349(jan02 1):g7647.*
